# Supplementary material for: Multiformin-Type Azaphilones Prevent SARS-CoV-2 Binding to ACE2 Receptor
Source: MDPI journal article supplement (doi:10.3390/cells12010083), 2022-12-25
Supplement: s1 [file s1]

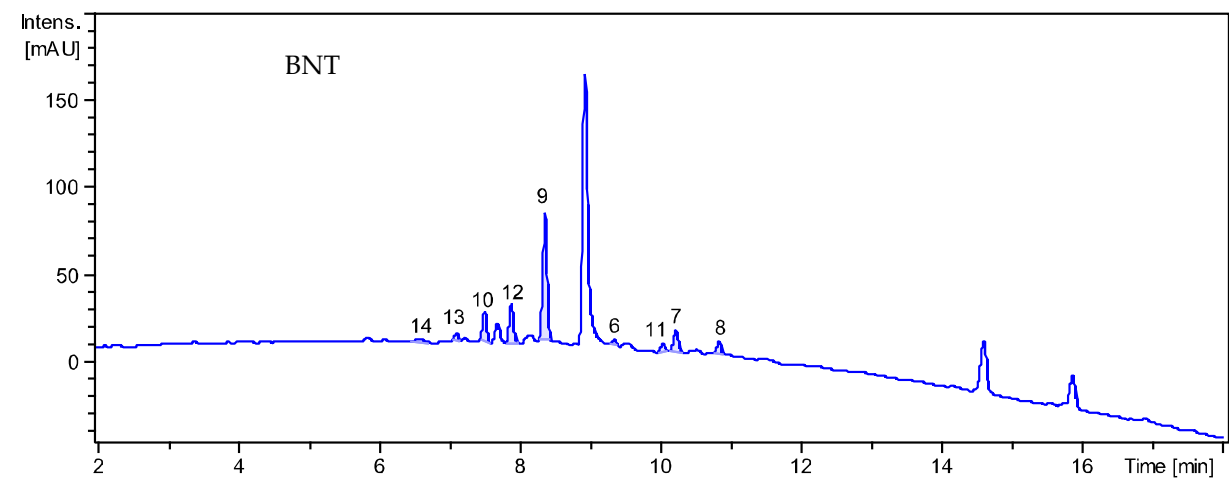

**Figure S1:** HPLC-UV/vis chromatograms of crude extracts of *Jackrogersella multiformis* at 210 nm. Peaks for multiformins A (6) - multiformin I (13) are marked with numbers.

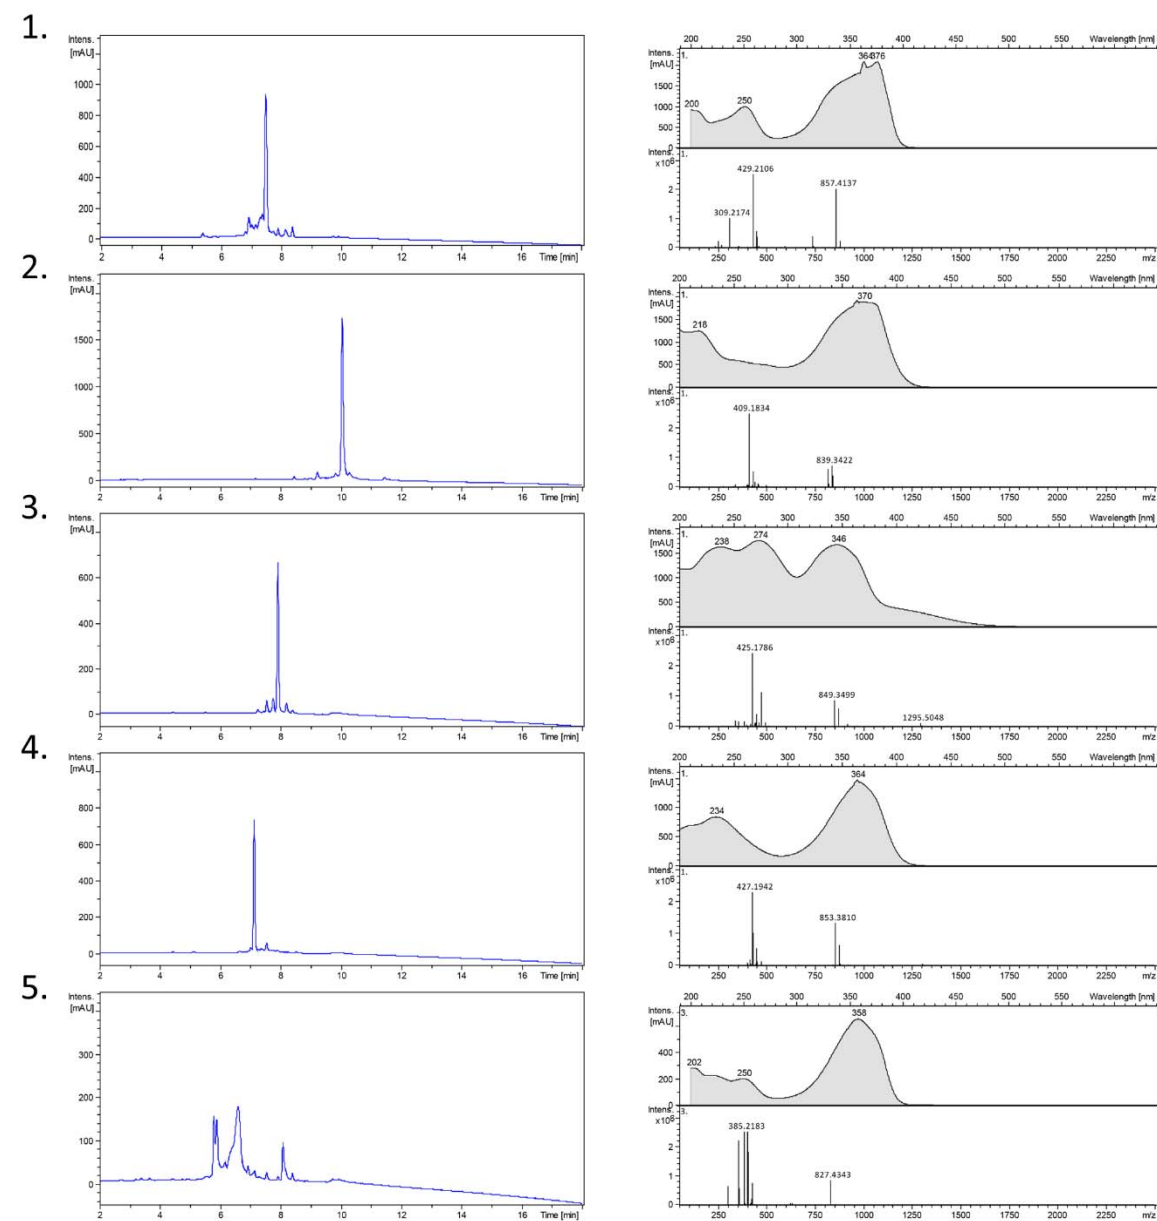

**Figure S2.** HPLC-UV/Vis chromatograms at 210 nm and HR-ESI-MS(+) spectra of multiformins E-I (9-13).

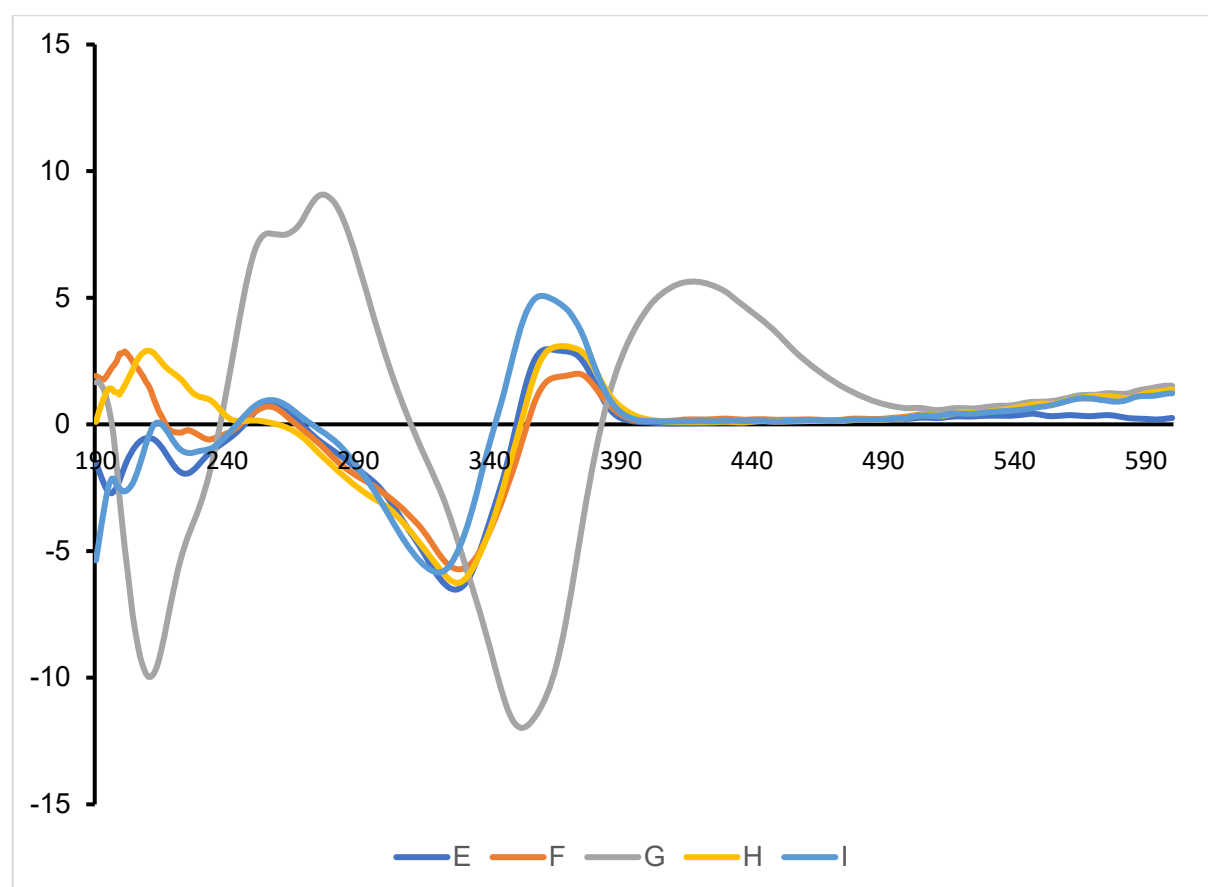

**Figure S3.** ECD spectra of multiformins E-I in methanol from 190 nm – 600 nm.

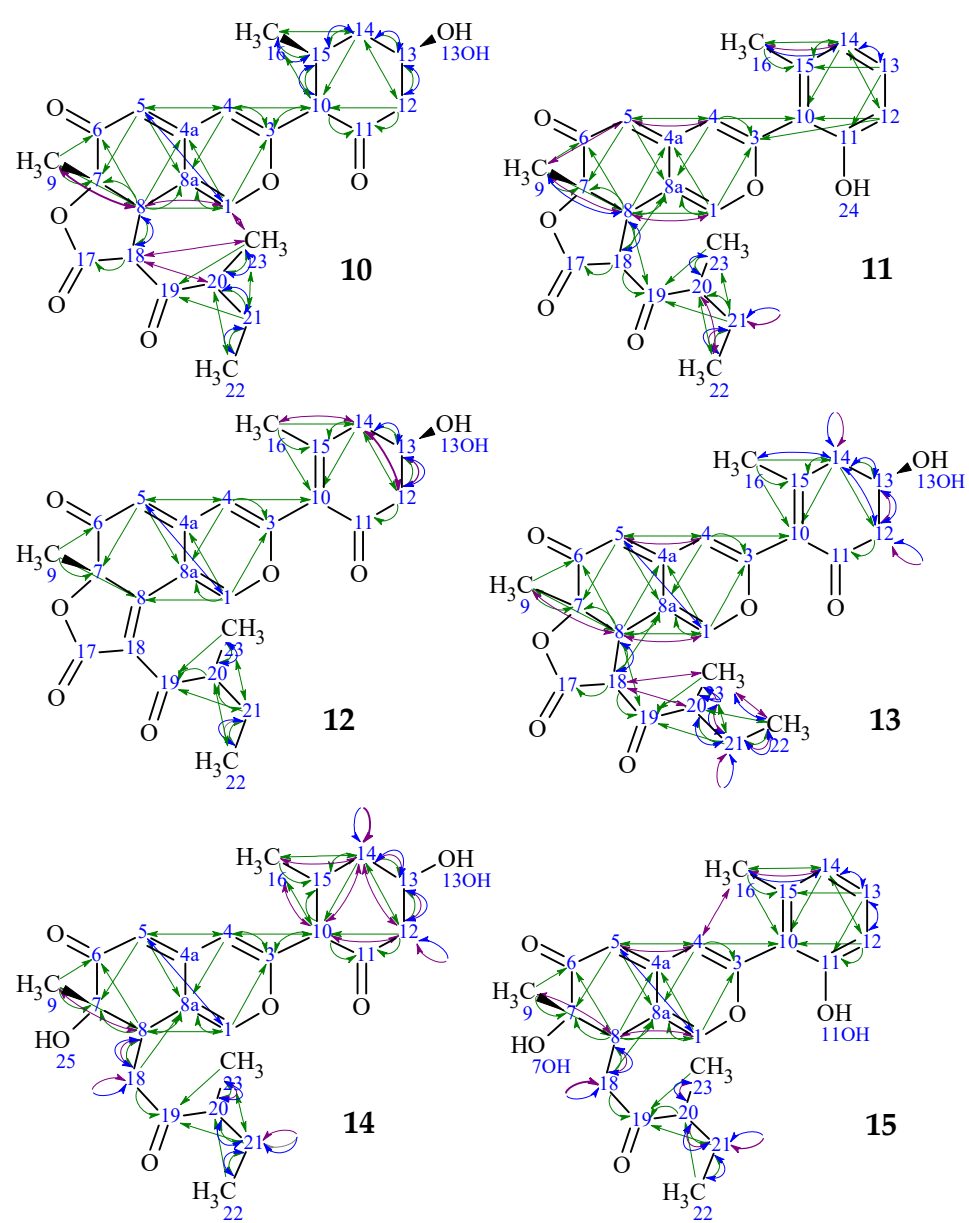

**Figure S4.** COSY (blue arrows), HMBC (green arrows) and ROESY (violet arrows) correlations indicating the structures of multiformins E (10) – J (15)

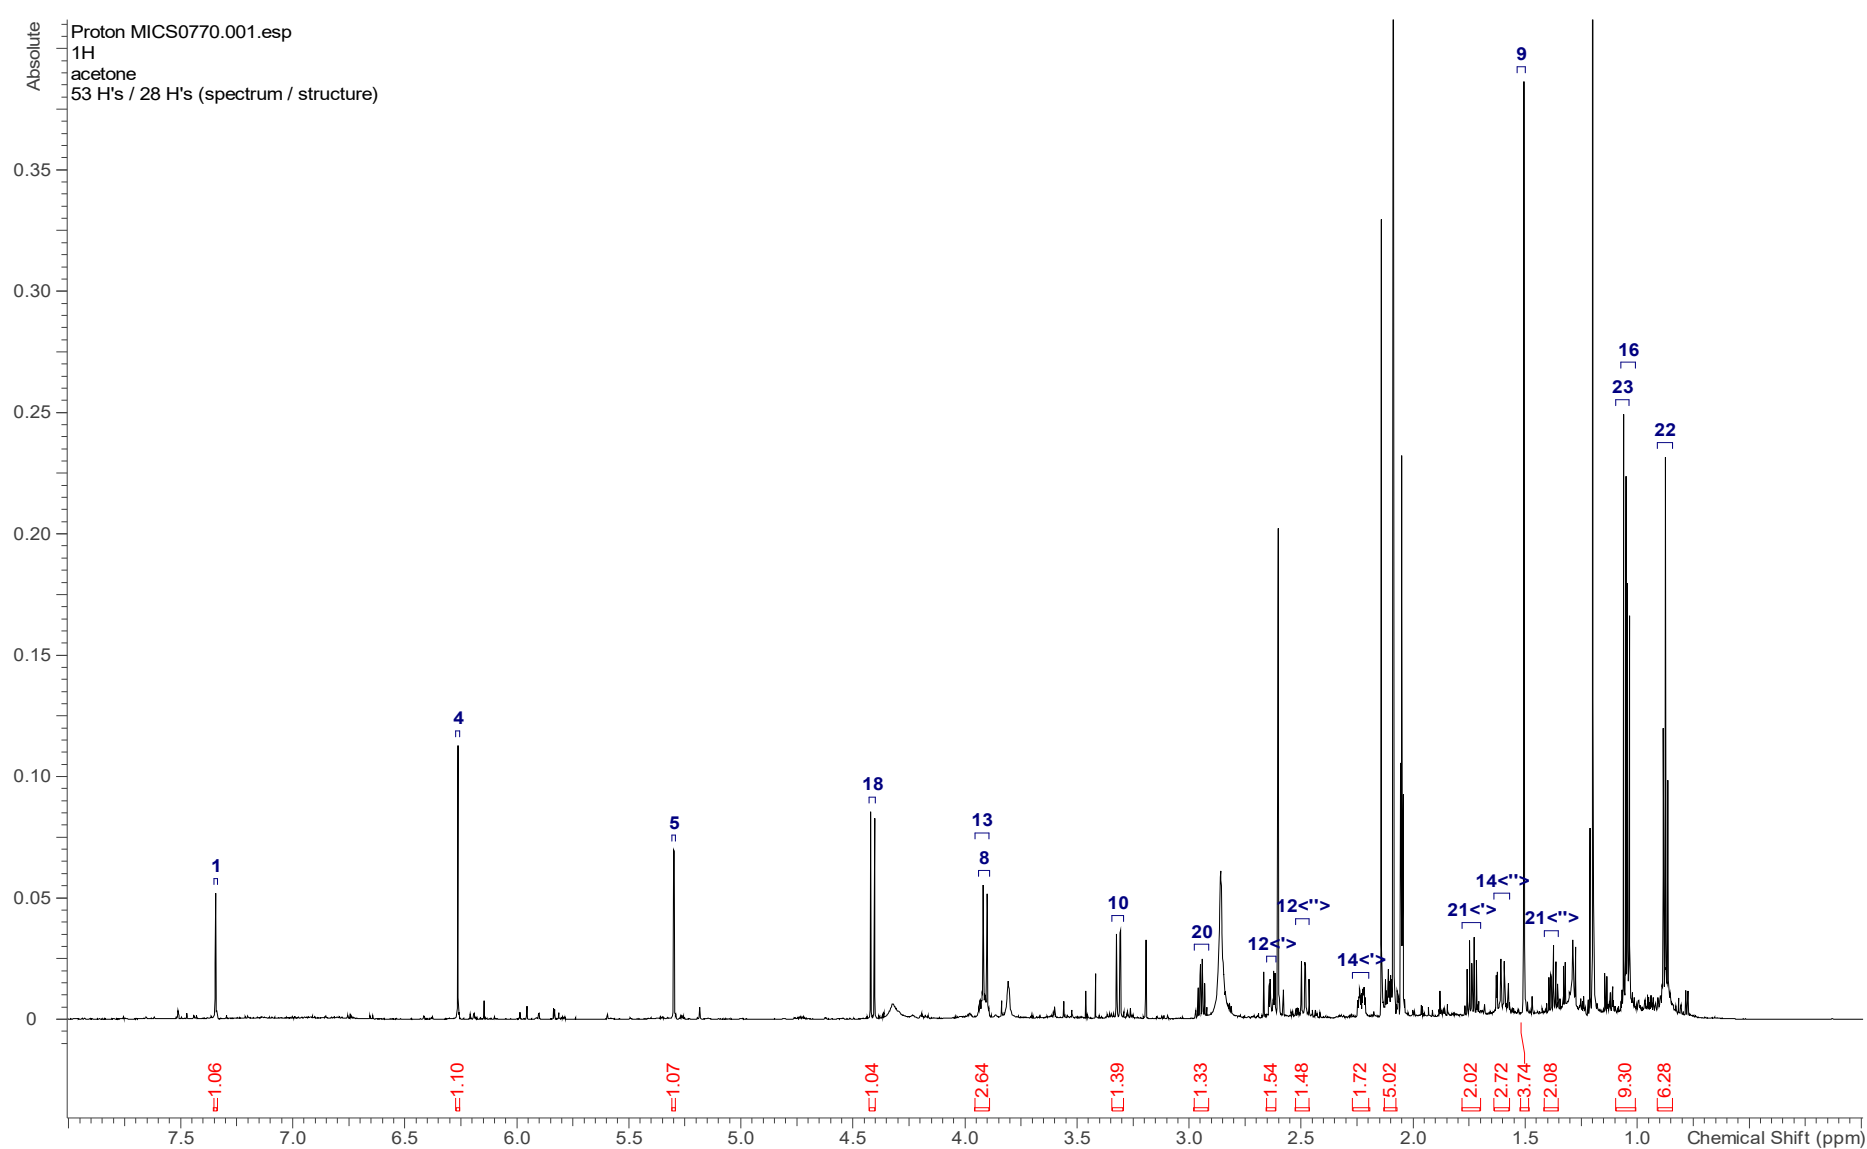

Figure S5. <sup>1</sup>H NMR spectrum (700 MHz, acetone-d<sub>6</sub>) of multiformin E (10).

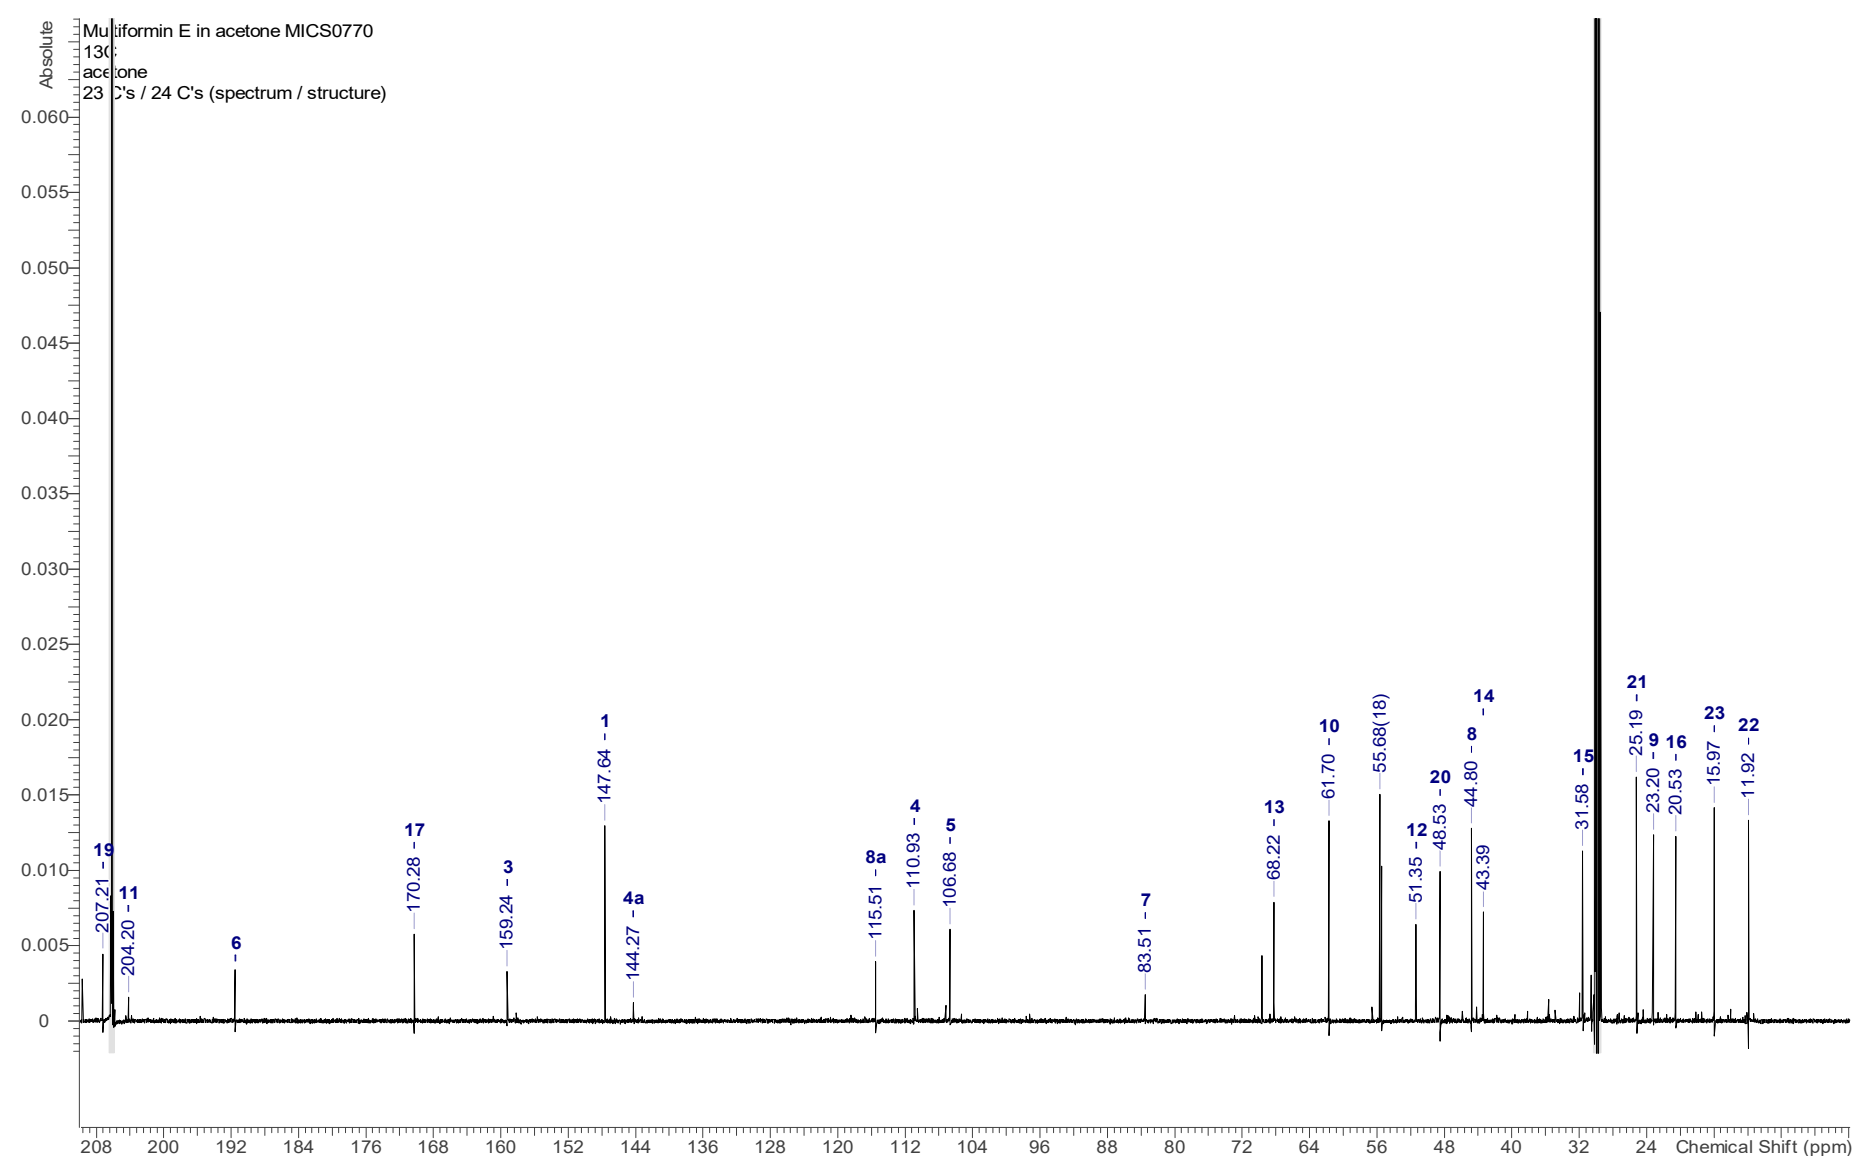

Figure S6. <sup>13</sup>C NMR spectrum (175 MHz, acetone-d<sub>6</sub>) of multiformin E (10).

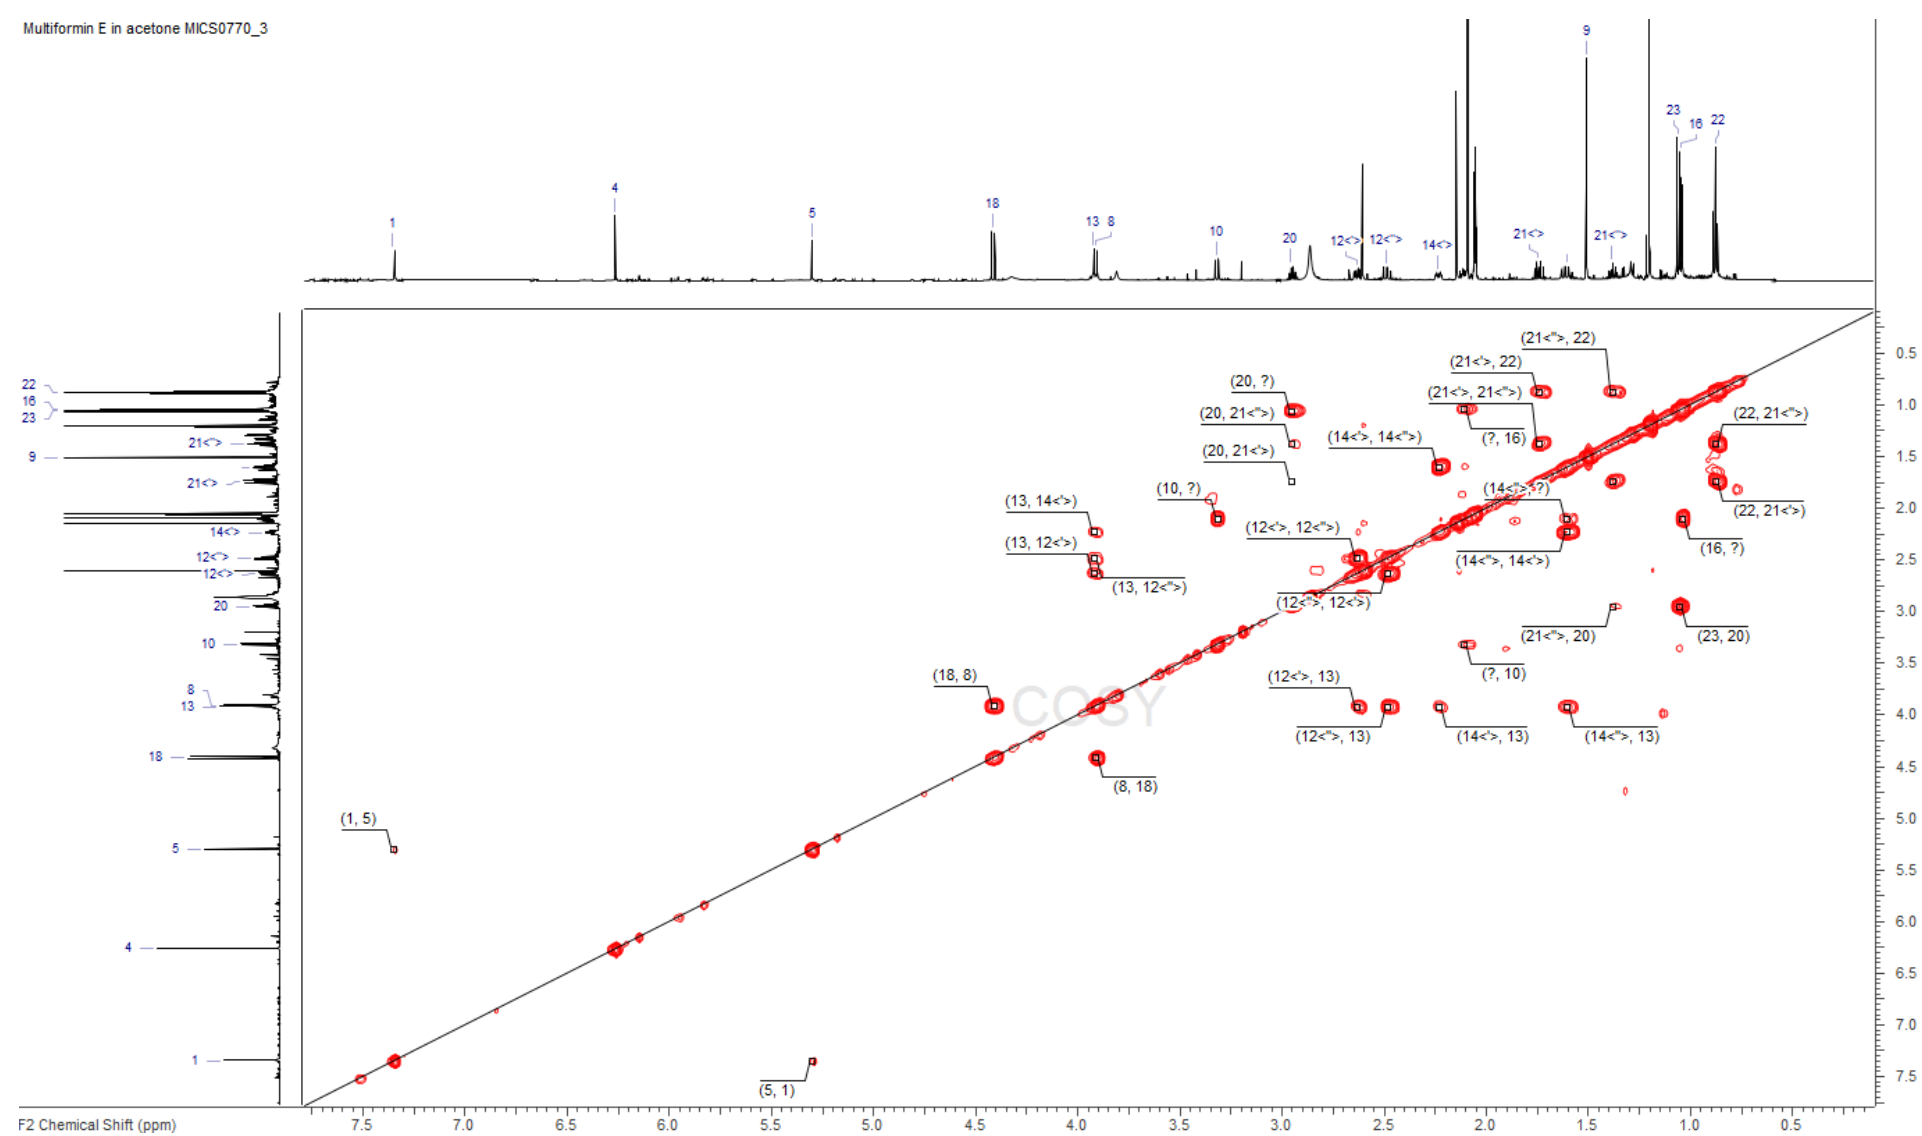

**Figure S7.** COSY NMR spectrum (700 MHz, acetone-*d*<sub>6</sub>) of multiformin E (**10**).

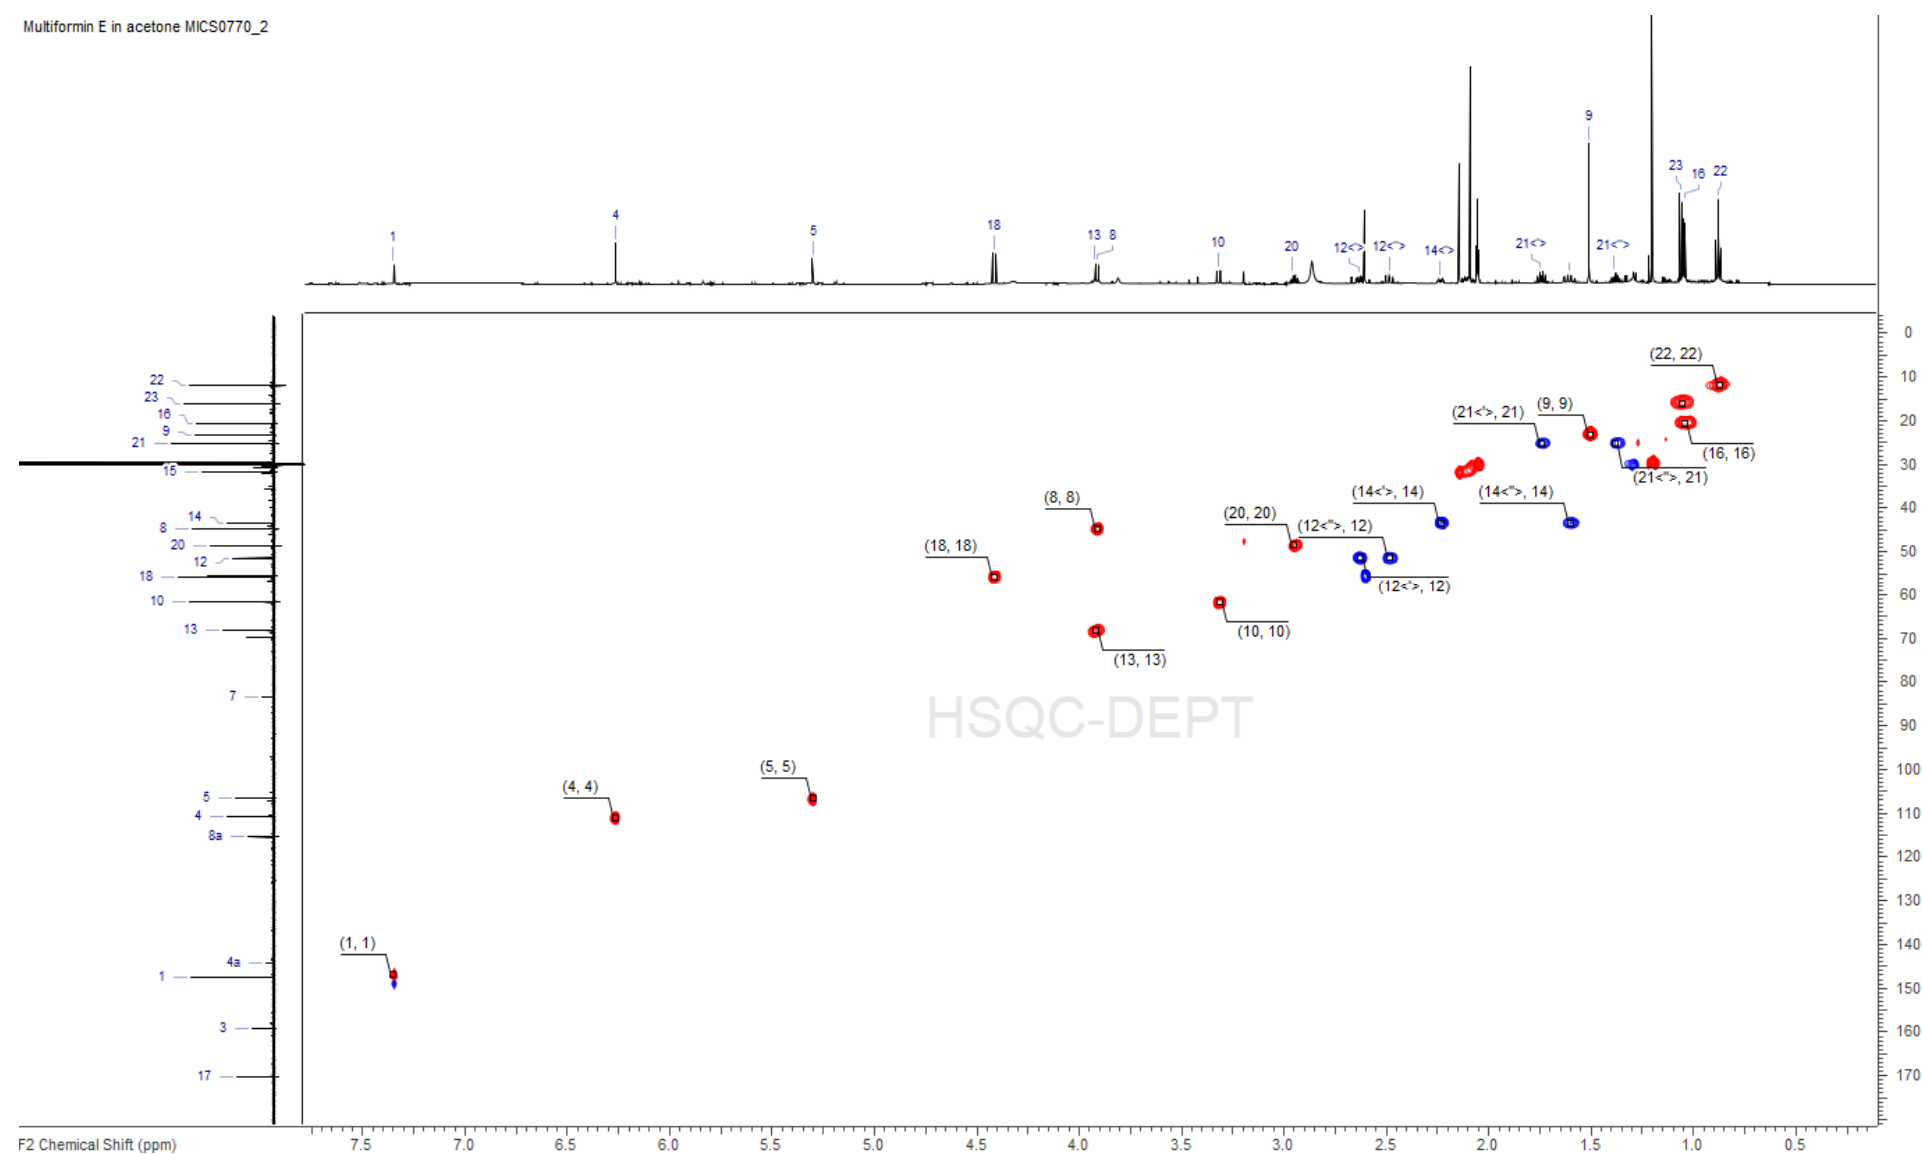

**Figure S8.** HSQC NMR spectrum (700 MHz, acetone-*d*<sub>6</sub>) of multiformin E (**10**).

[illegible]

**Figure S10.** ROESY NMR spectrum (700 MHz, acetone-*d*<sub>6</sub>) of multiformin E (**10**).

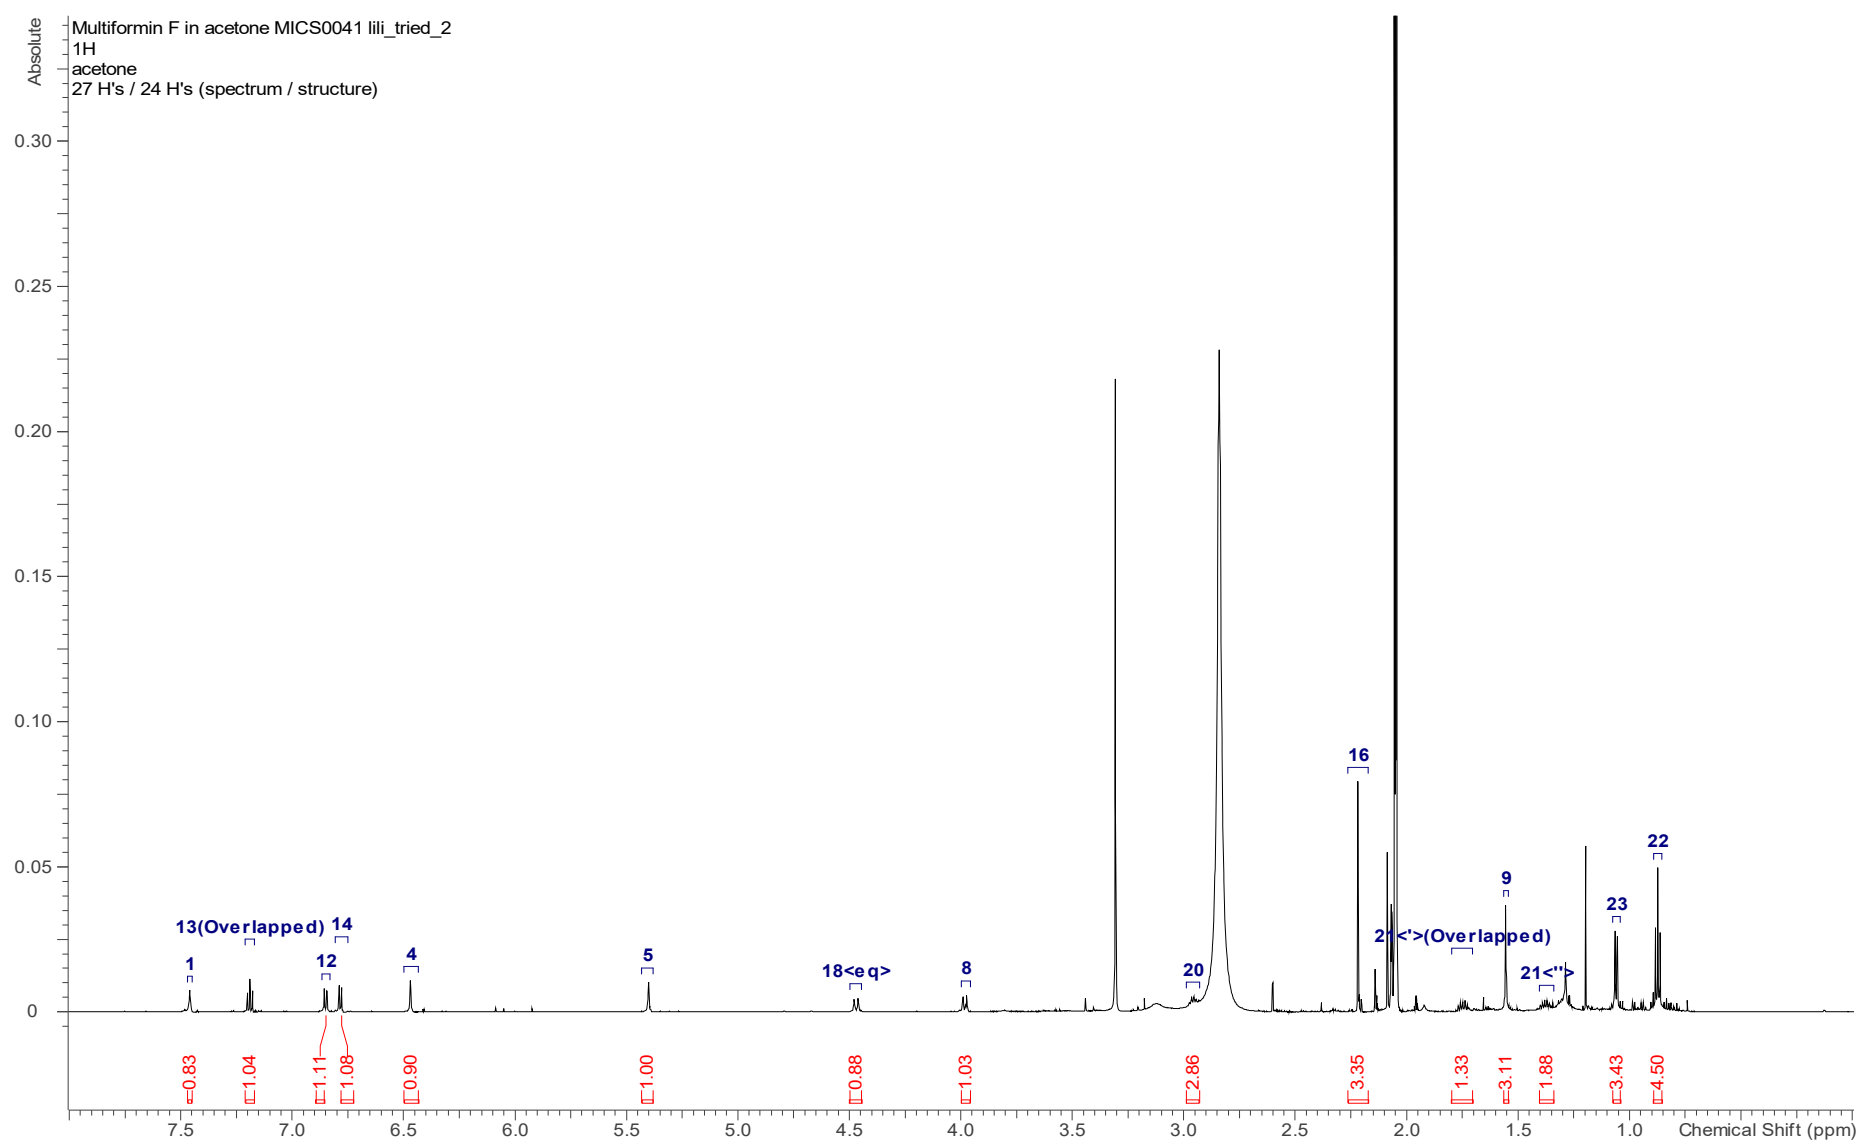

Figure S11. <sup>1</sup>H NMR spectrum (700 MHz, acetone-*d*<sub>6</sub>) of multiformin F (**11**).

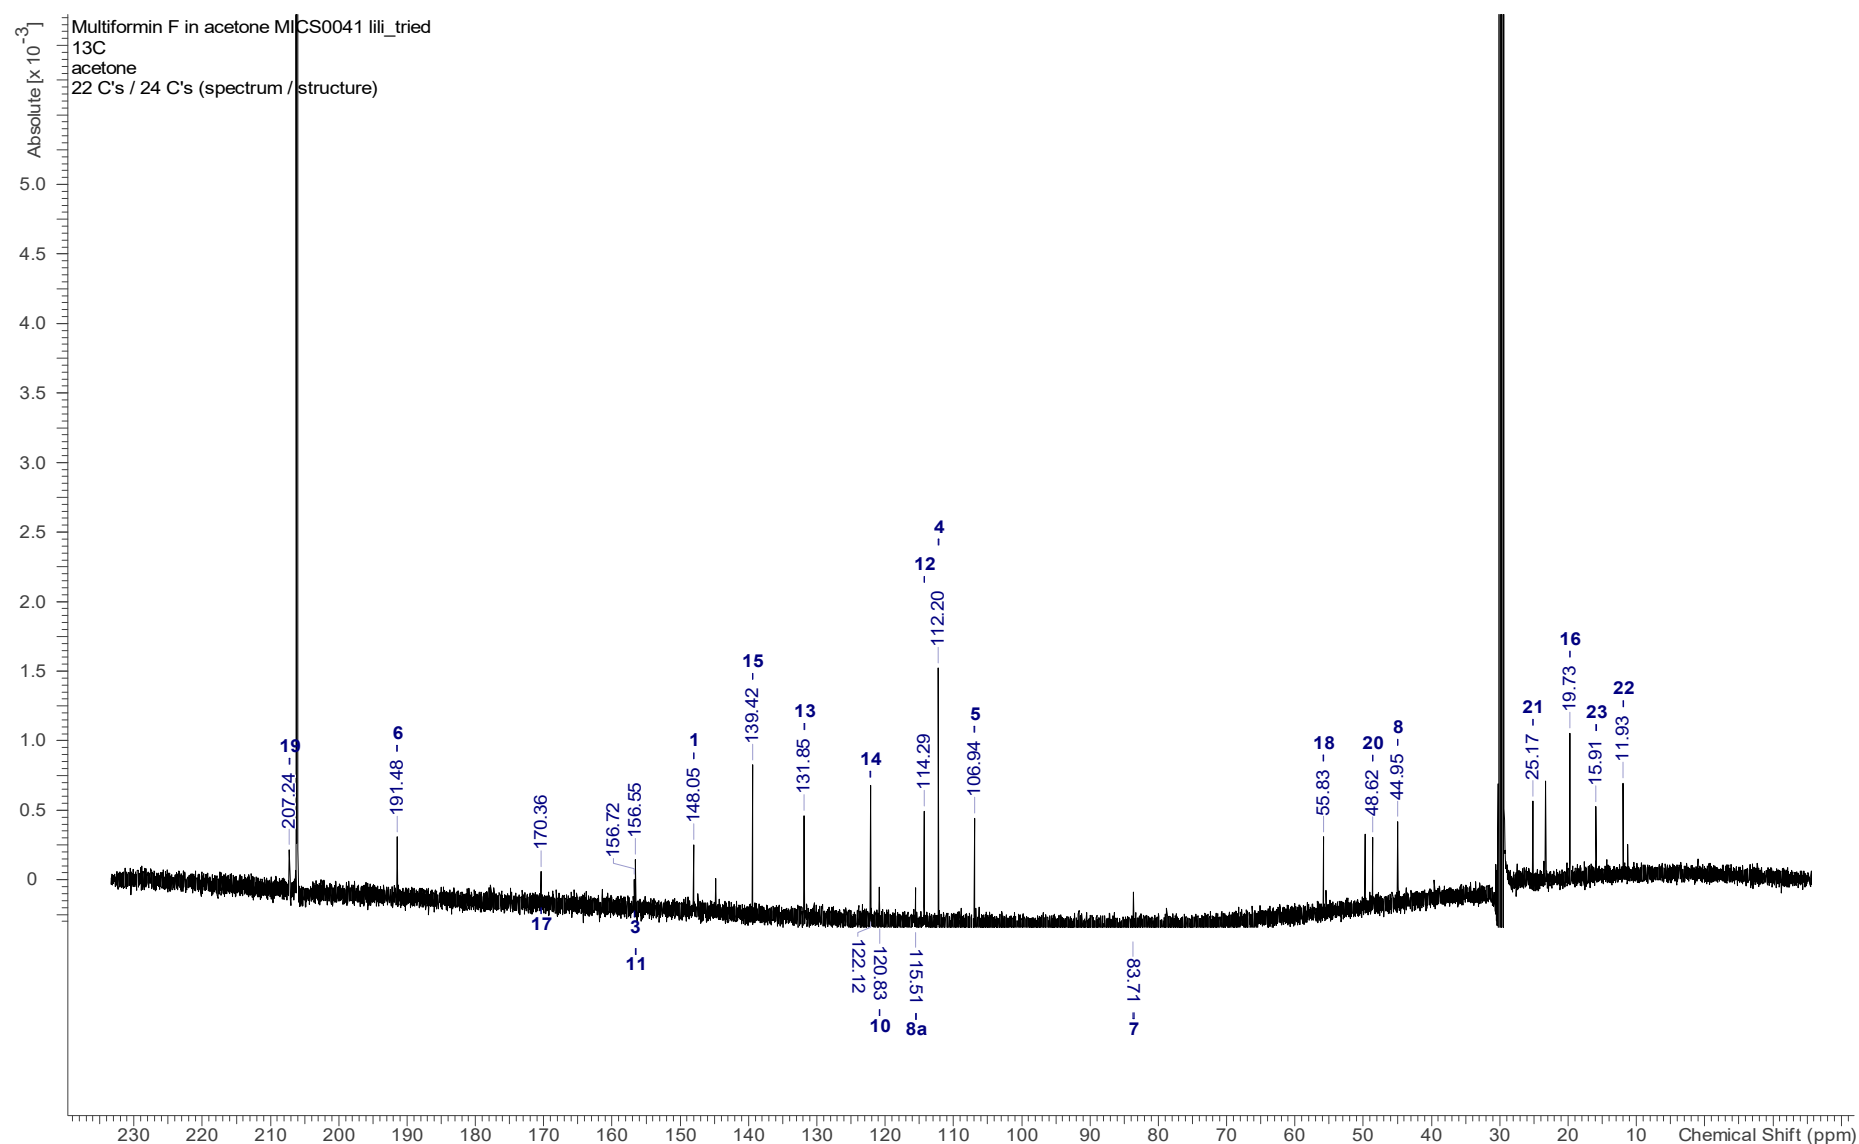

Figure S12. <sup>13</sup>C NMR spectrum (175 MHz, acetone-*d*<sub>6</sub>) of multiformin F (**11**).

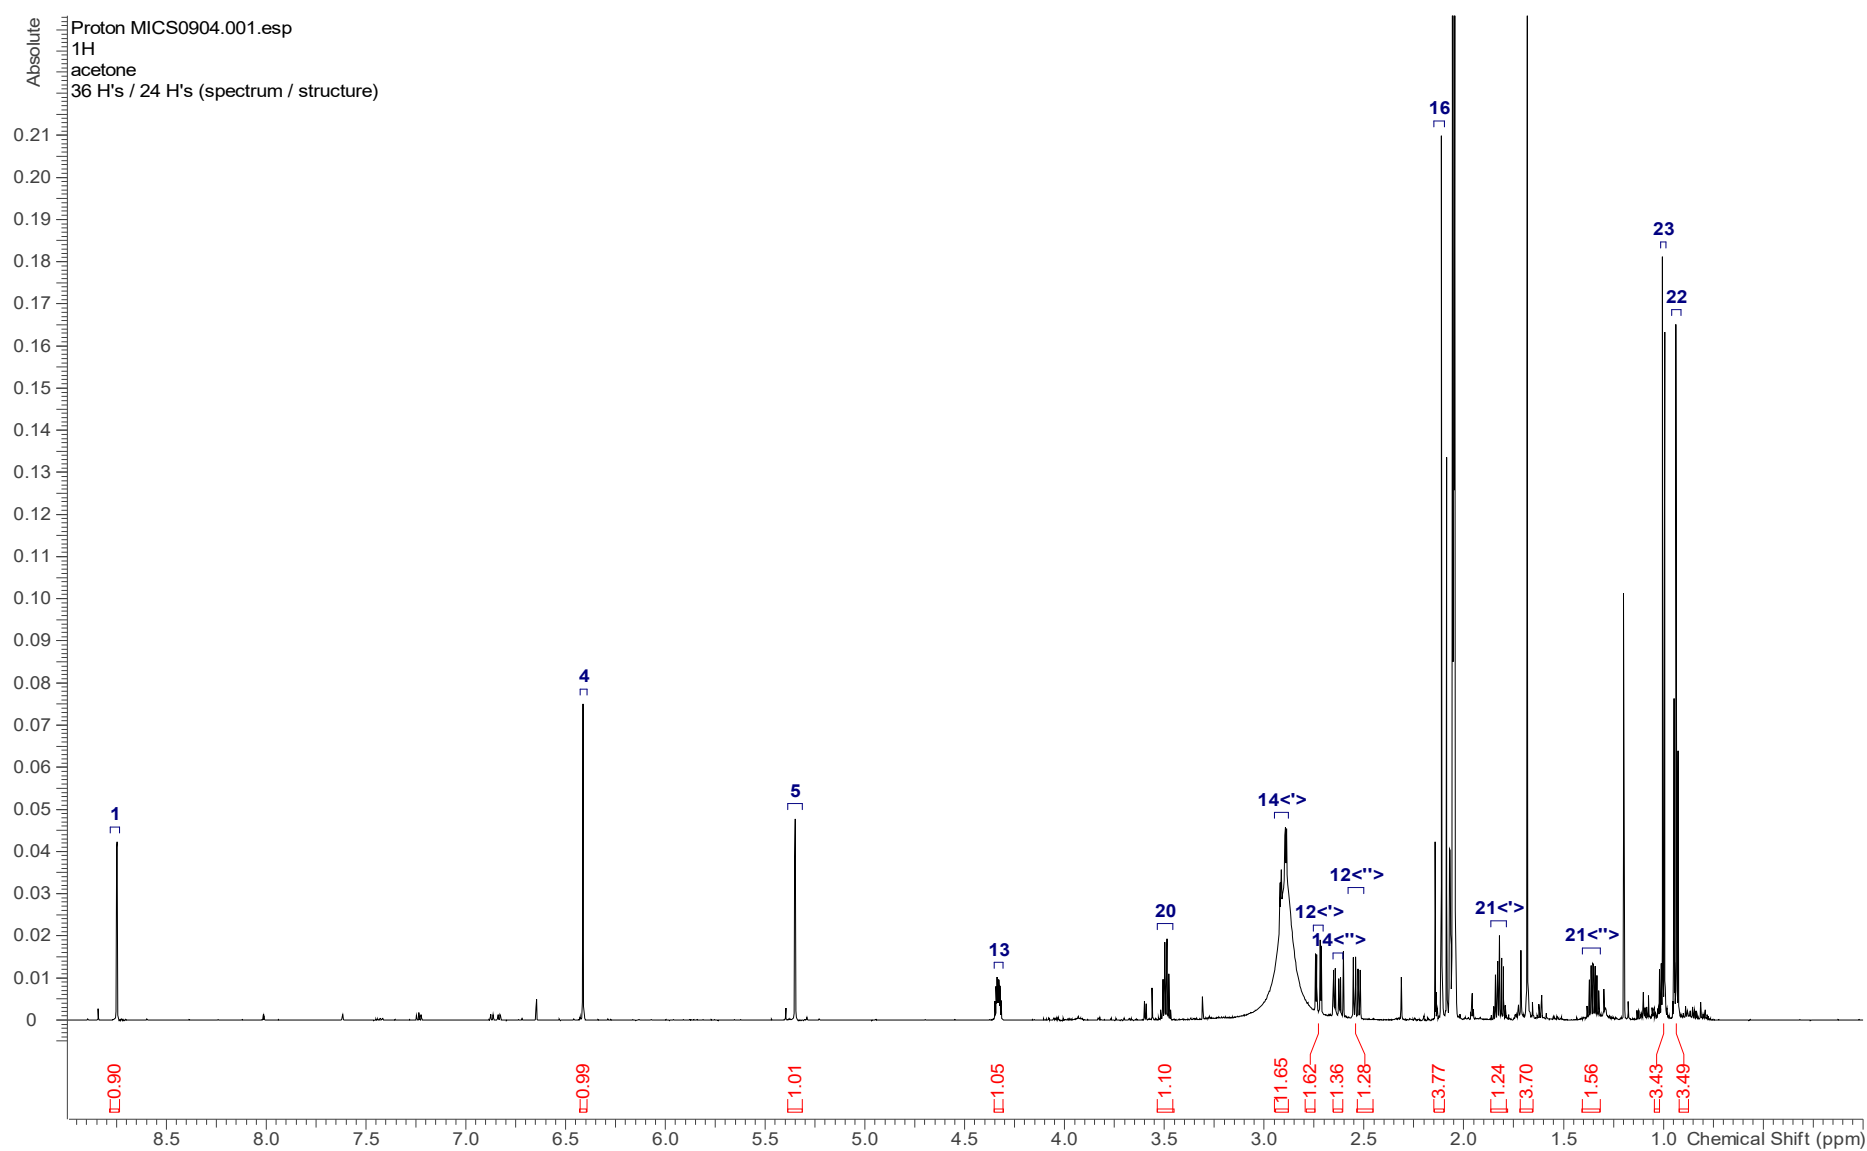

Figure S13.  $^1\text{H}$  NMR spectrum (700 MHz, acetone- $d_6$ ) of multiformin G (12).

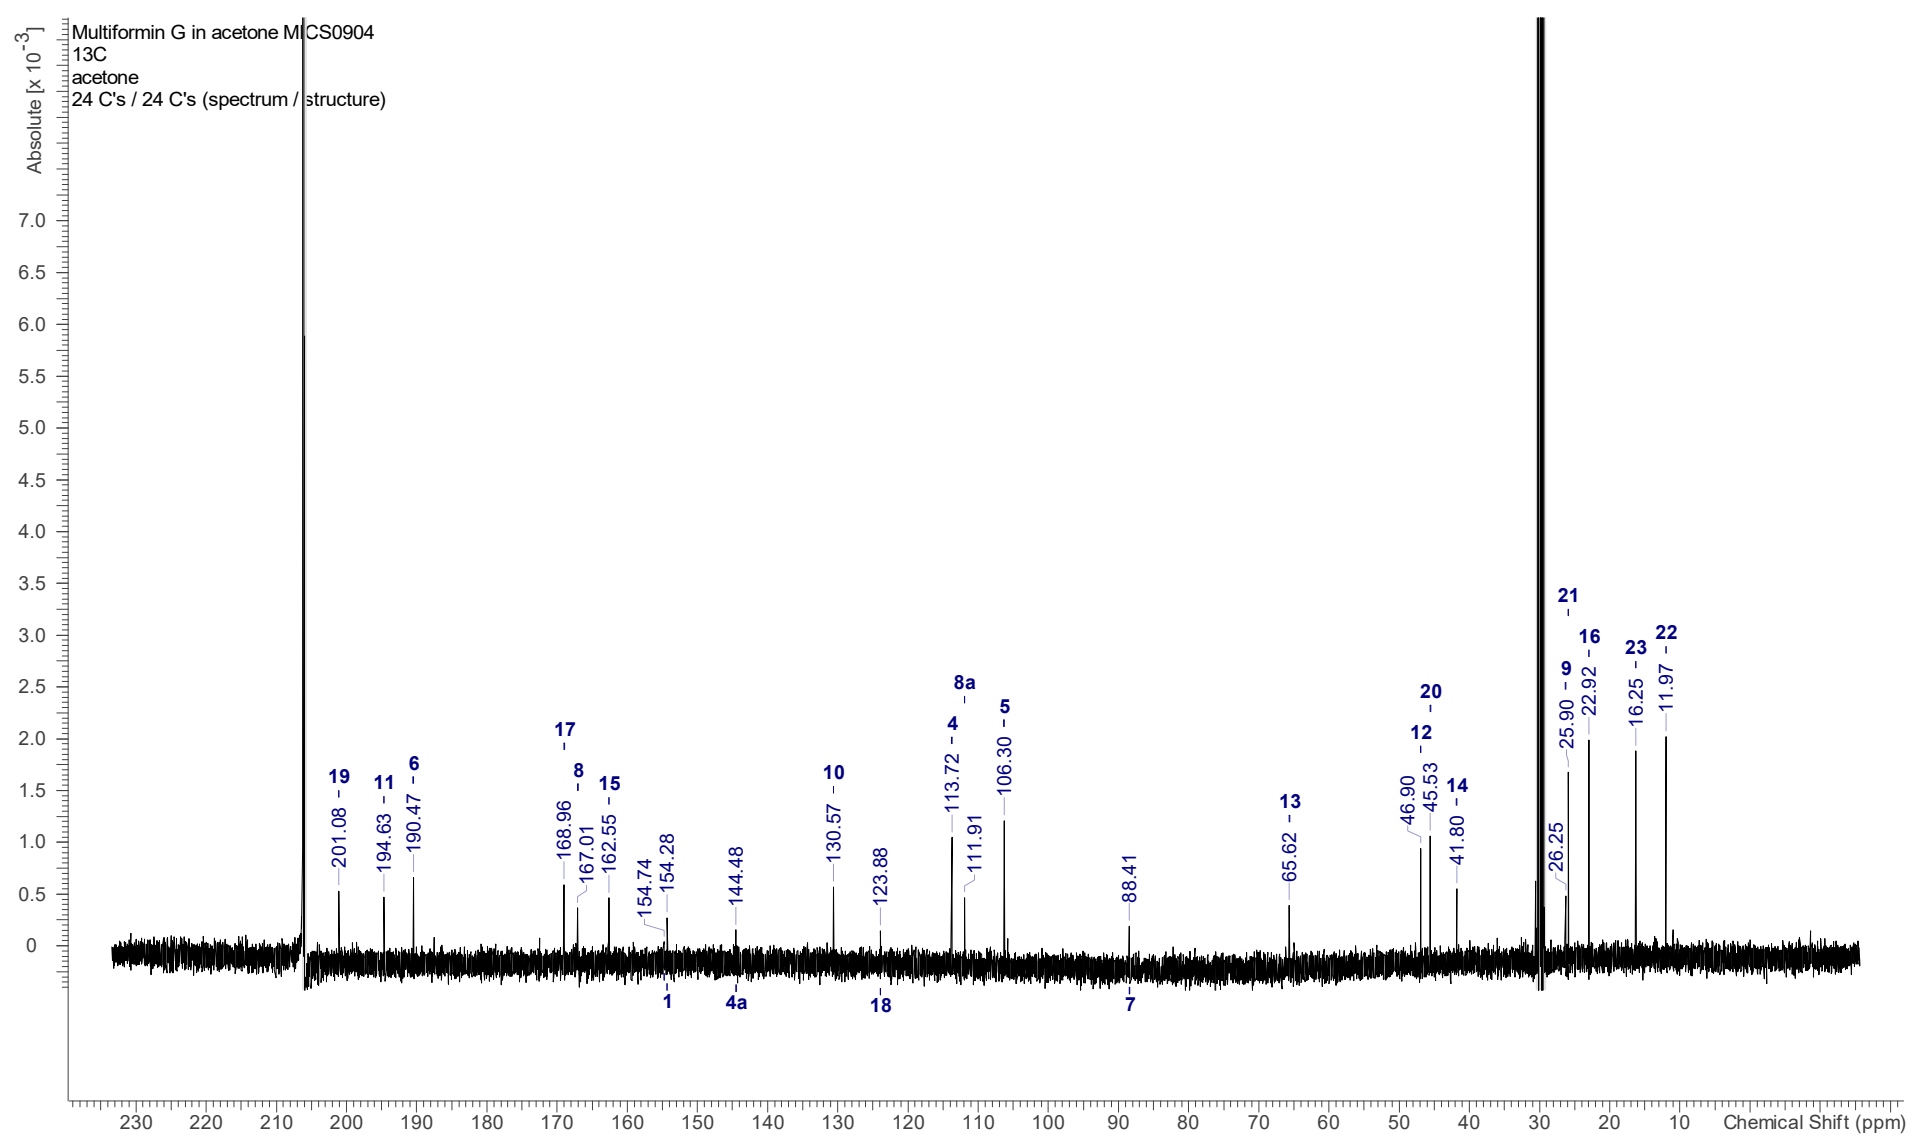

Figure S14.  $^{13}\text{C}$  NMR spectrum (175 MHz, acetone- $d_6$ ) of multiformin G (12).

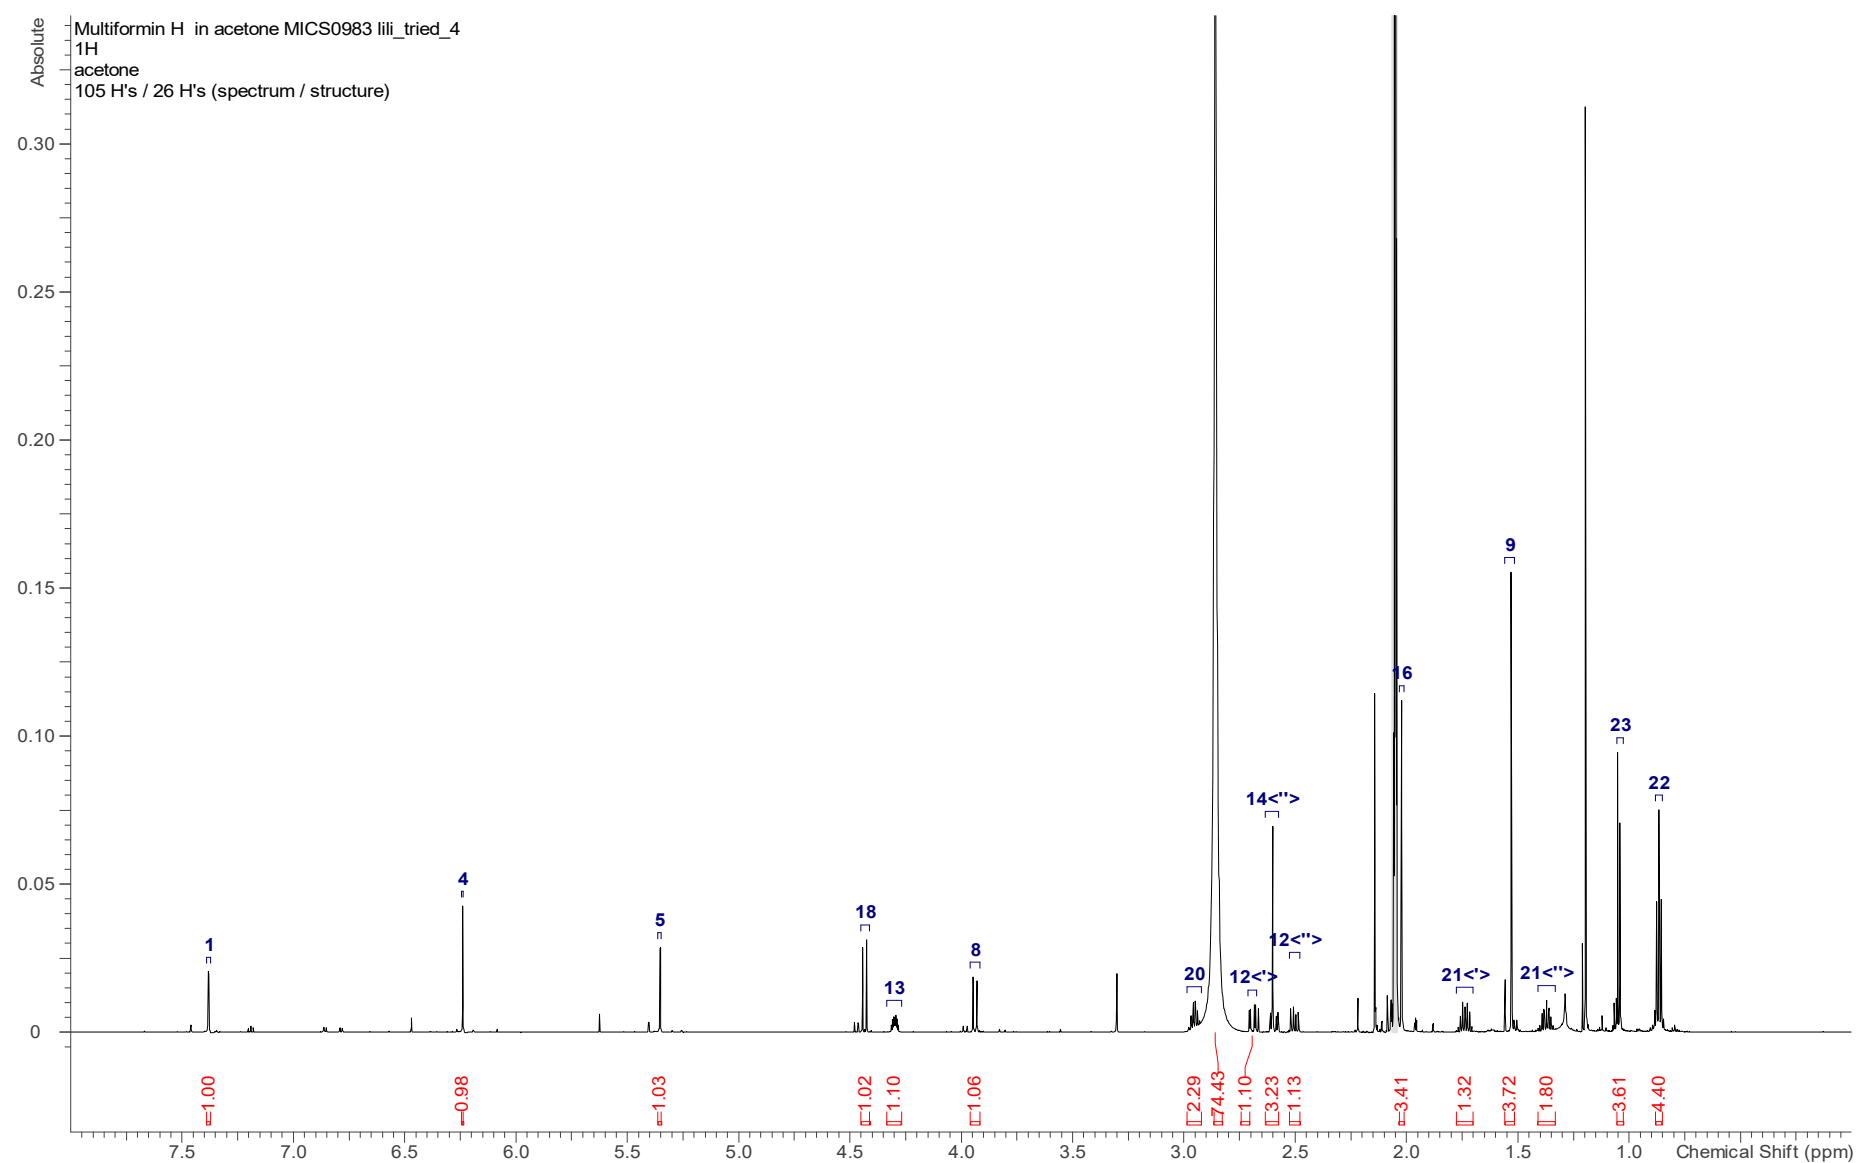

Figure S15. <sup>1</sup>H NMR spectrum (700 MHz, acetone-*d*<sub>6</sub>) of multiformin H (13).

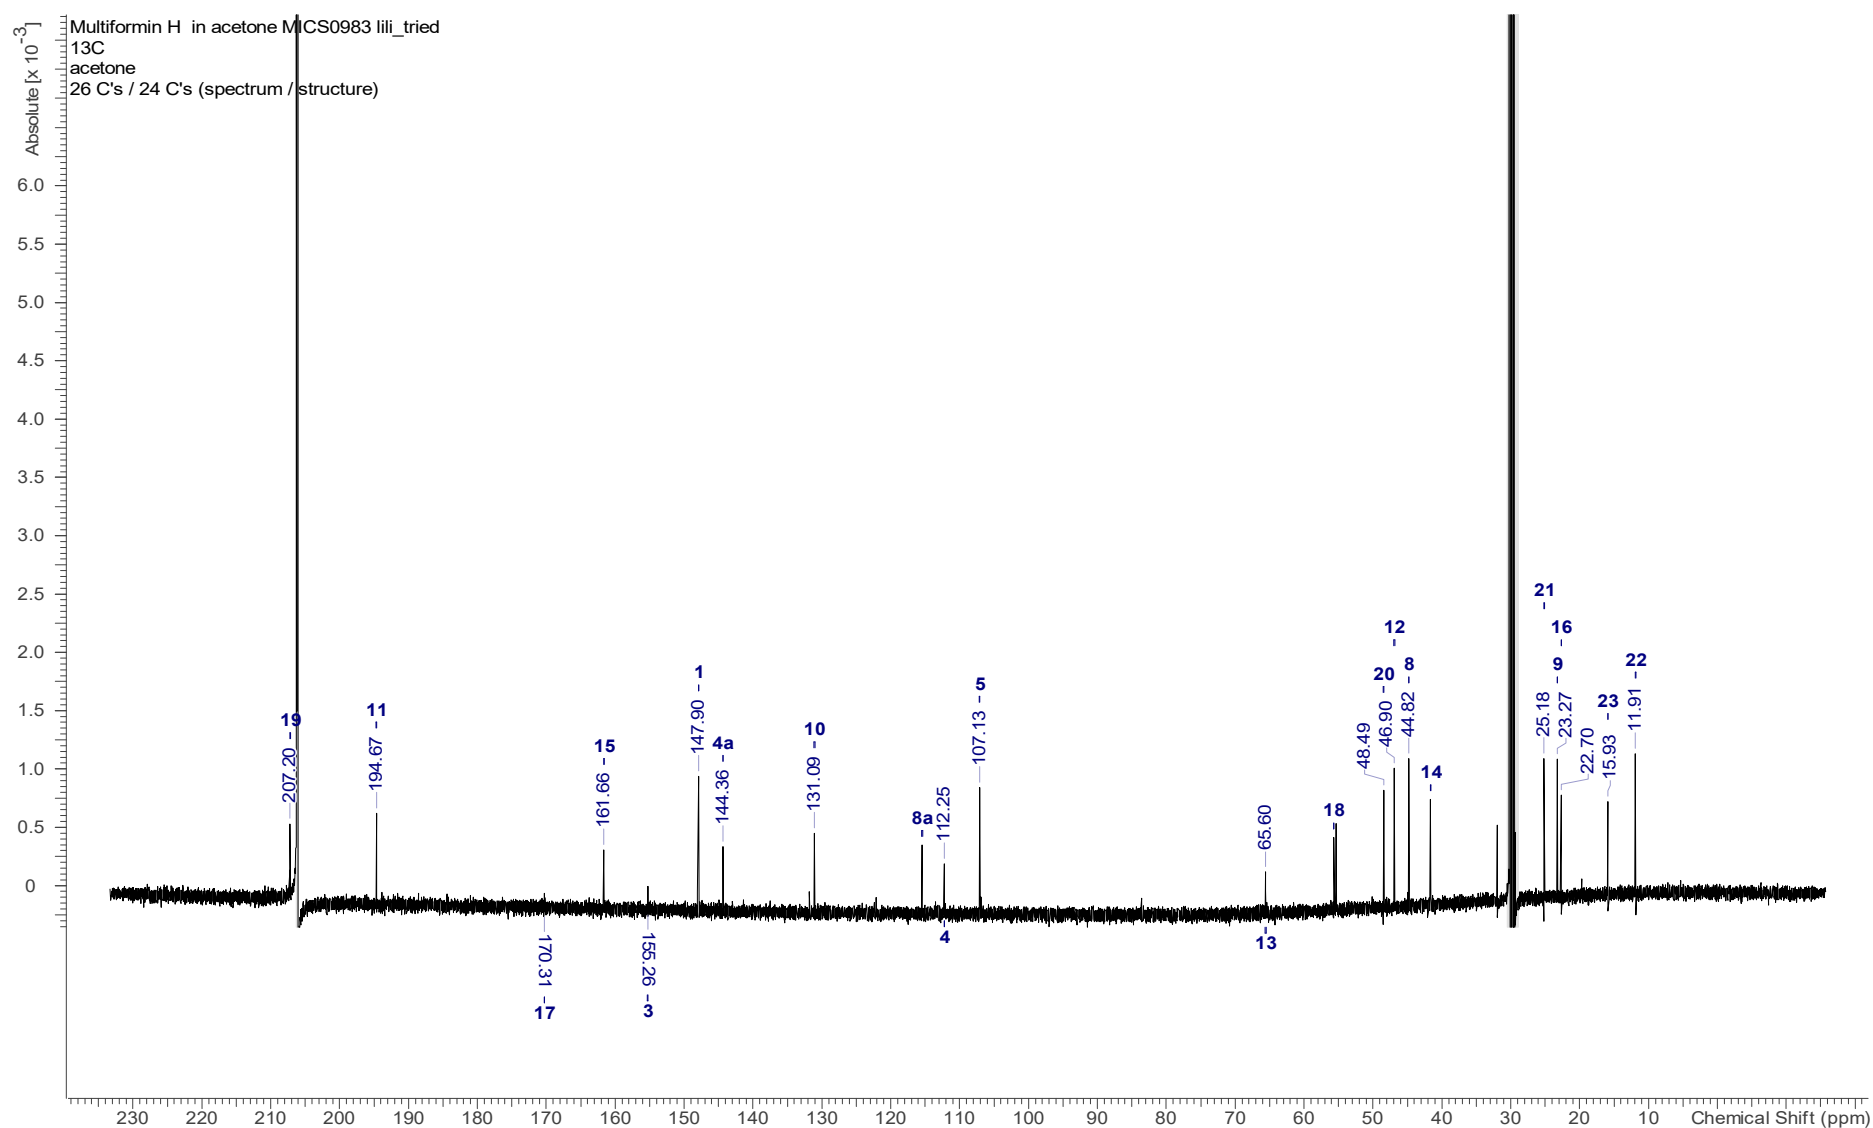

Figure S16. <sup>13</sup>C NMR spectrum (175 MHz, acetone-*d*<sub>6</sub>) of multiformin H (13).

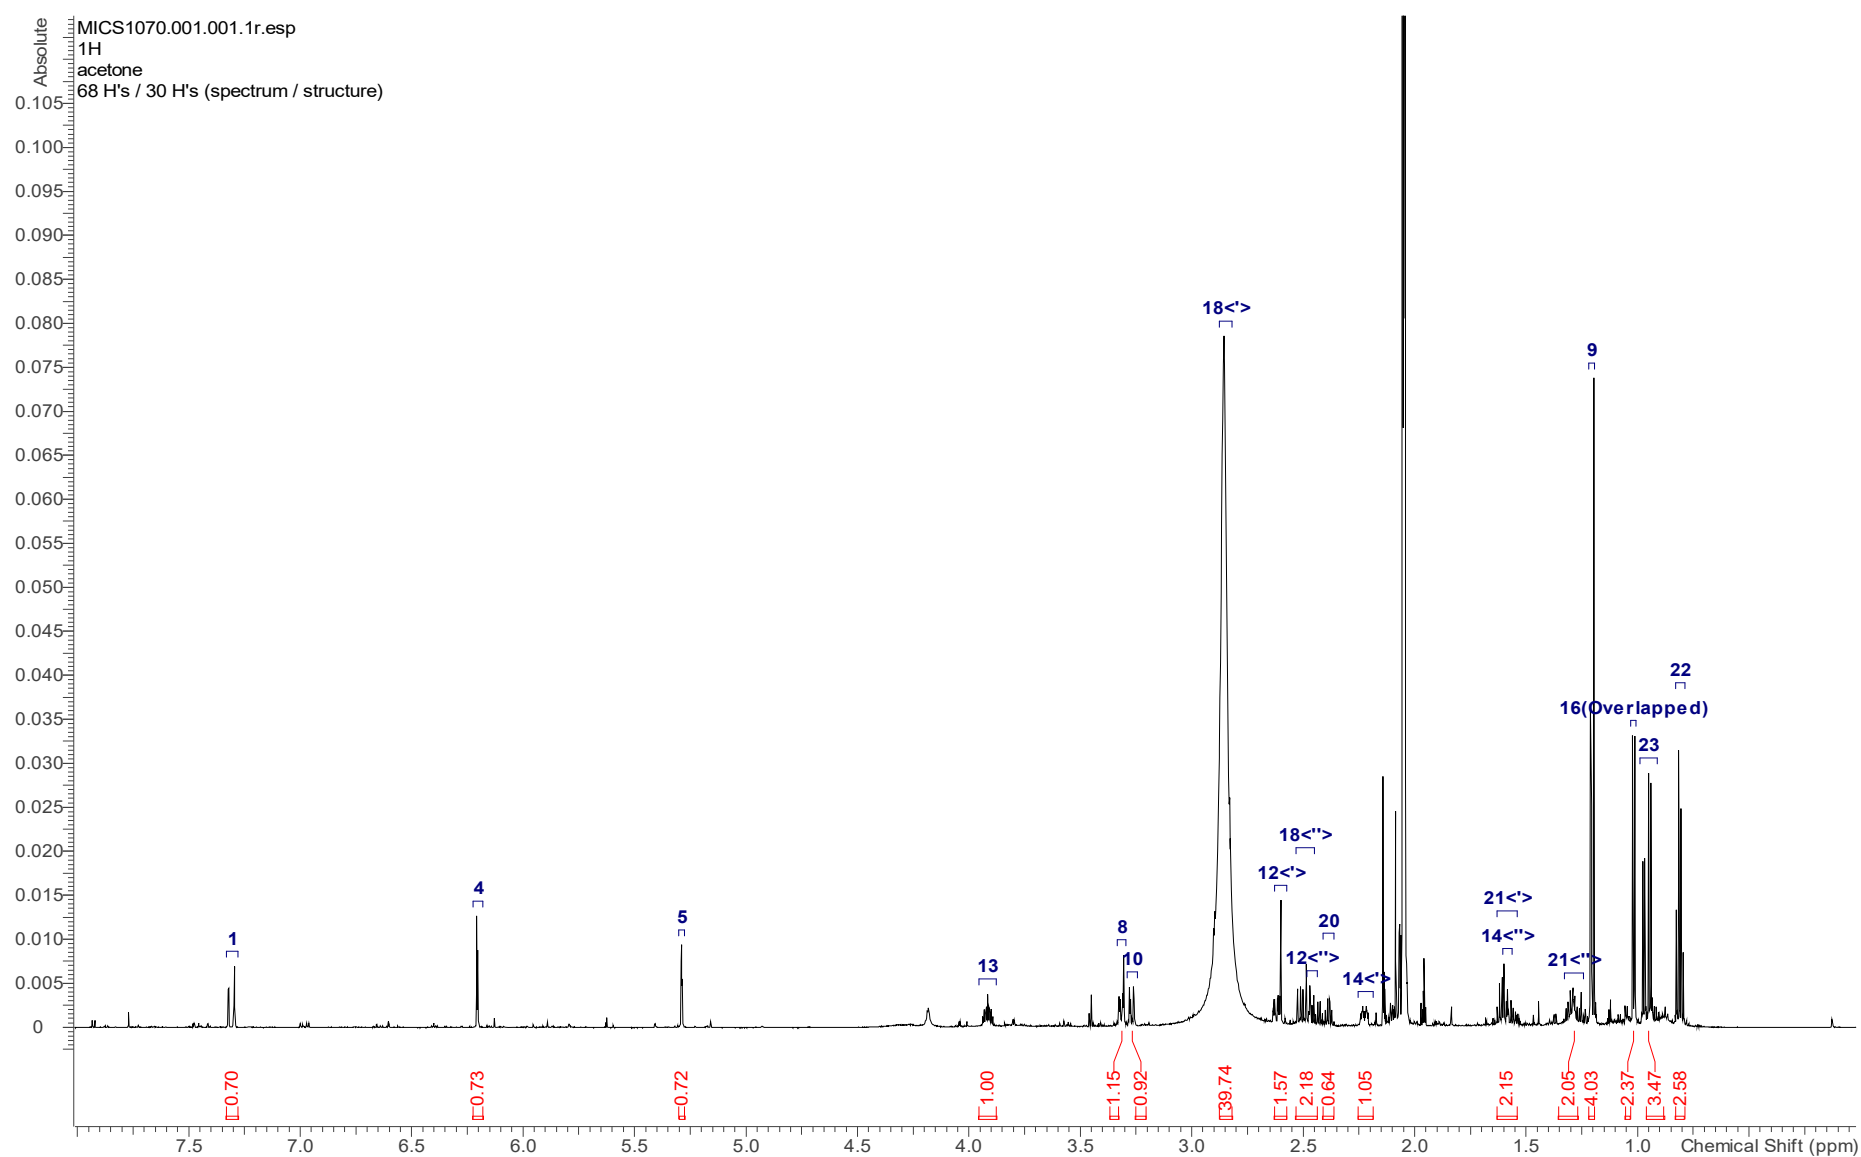

Figure S17. <sup>1</sup>H NMR spectrum (700 MHz, acetone-*d*<sub>6</sub>) of multiformin I (14).

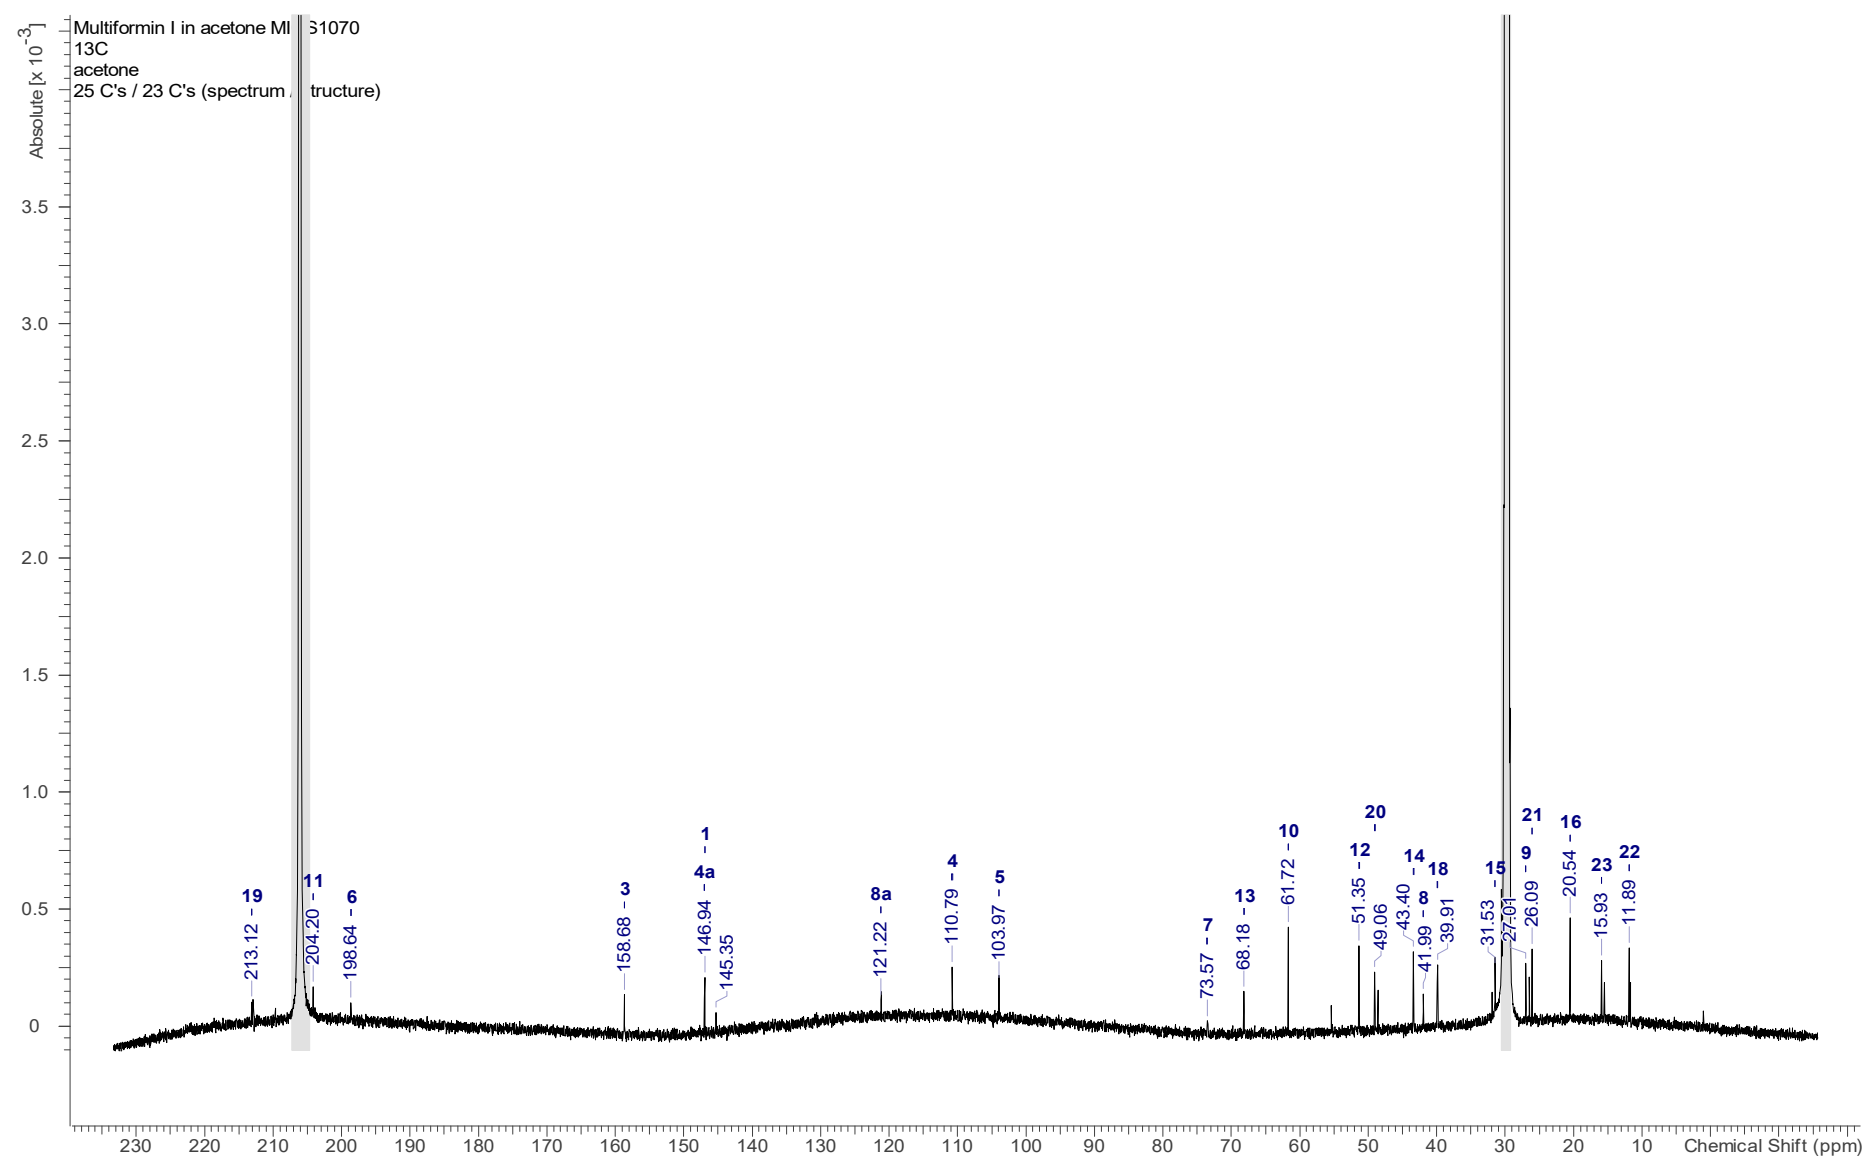

Figure S18. <sup>13</sup>C NMR spectrum (175 MHz, acetone-*d*<sub>6</sub>) of multiformin I (14).

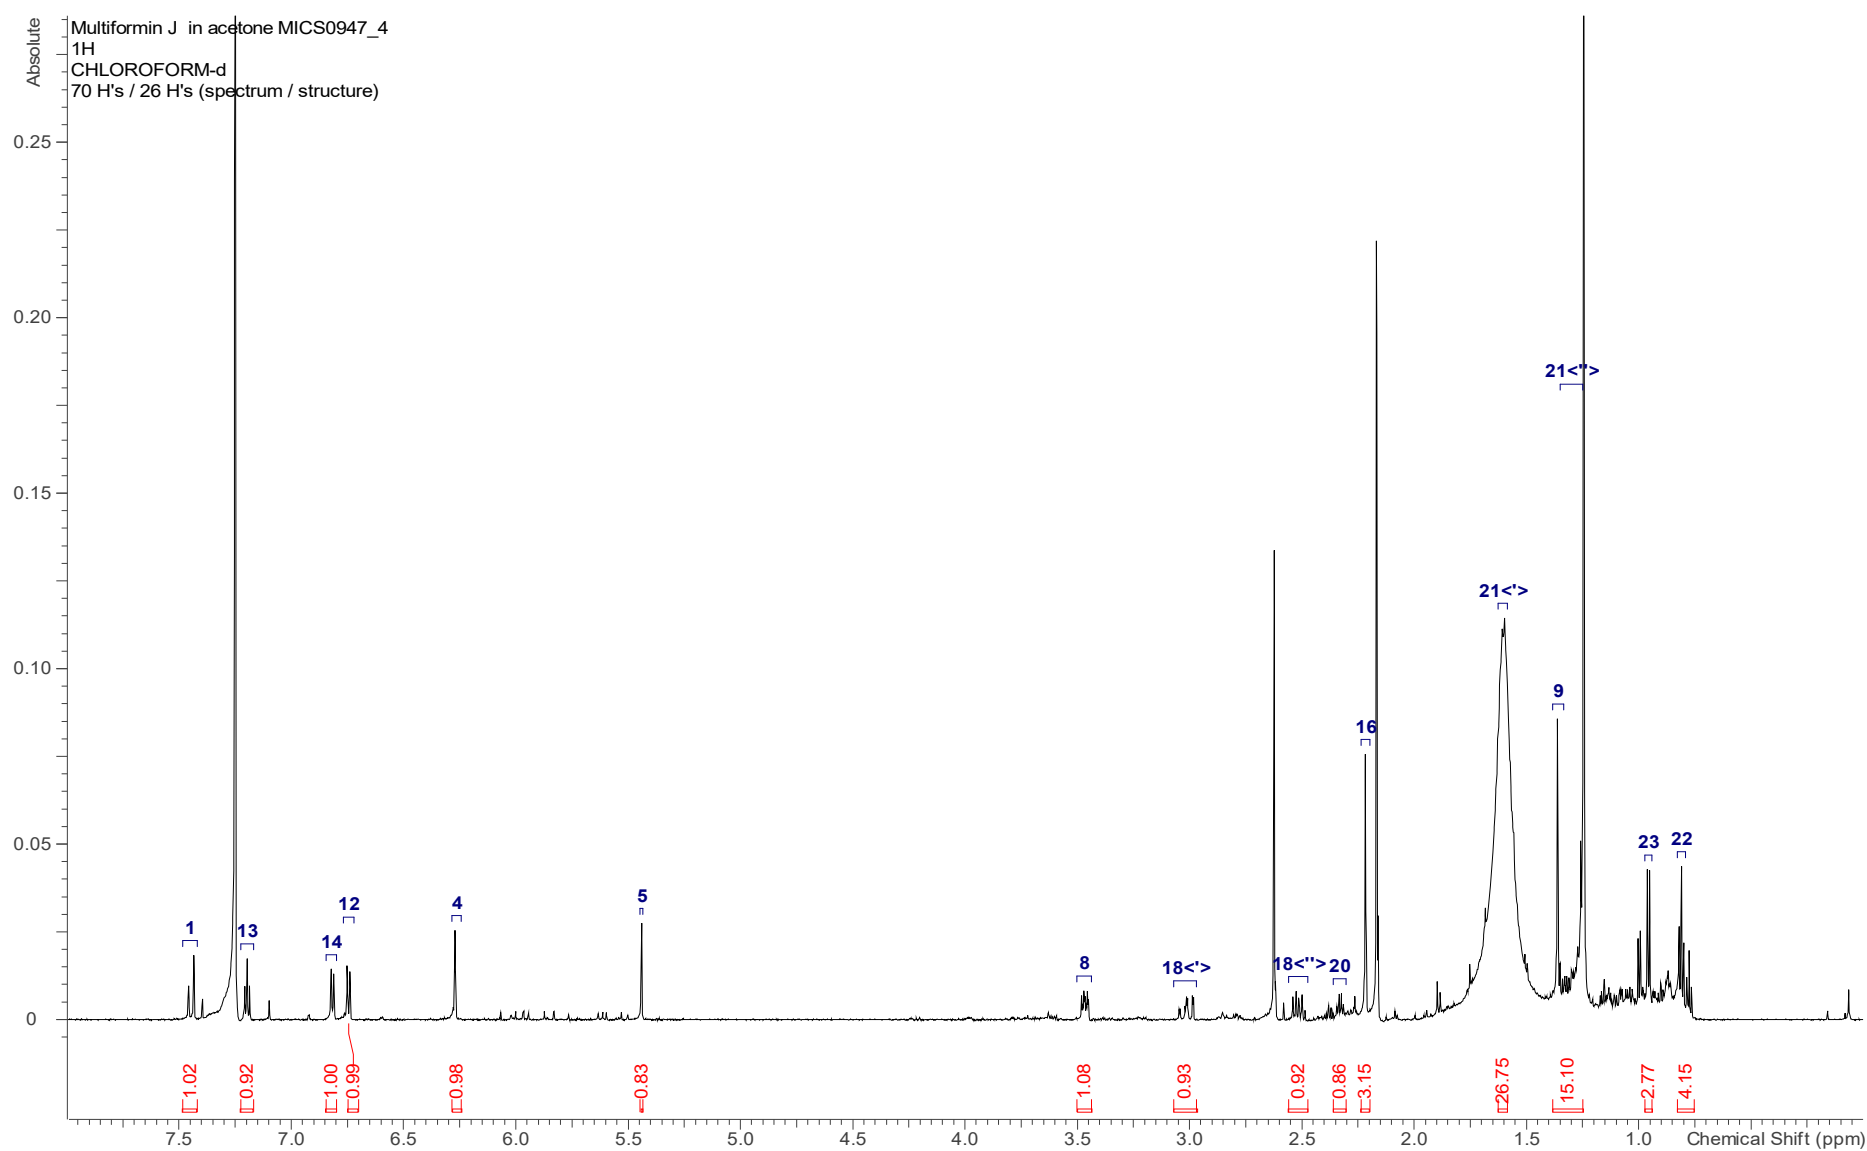

Figure S19.  $^1\text{H}$  NMR spectrum (700 MHz,  $\text{CDCl}_3\text{-}d$ ) of multiformin J (15).

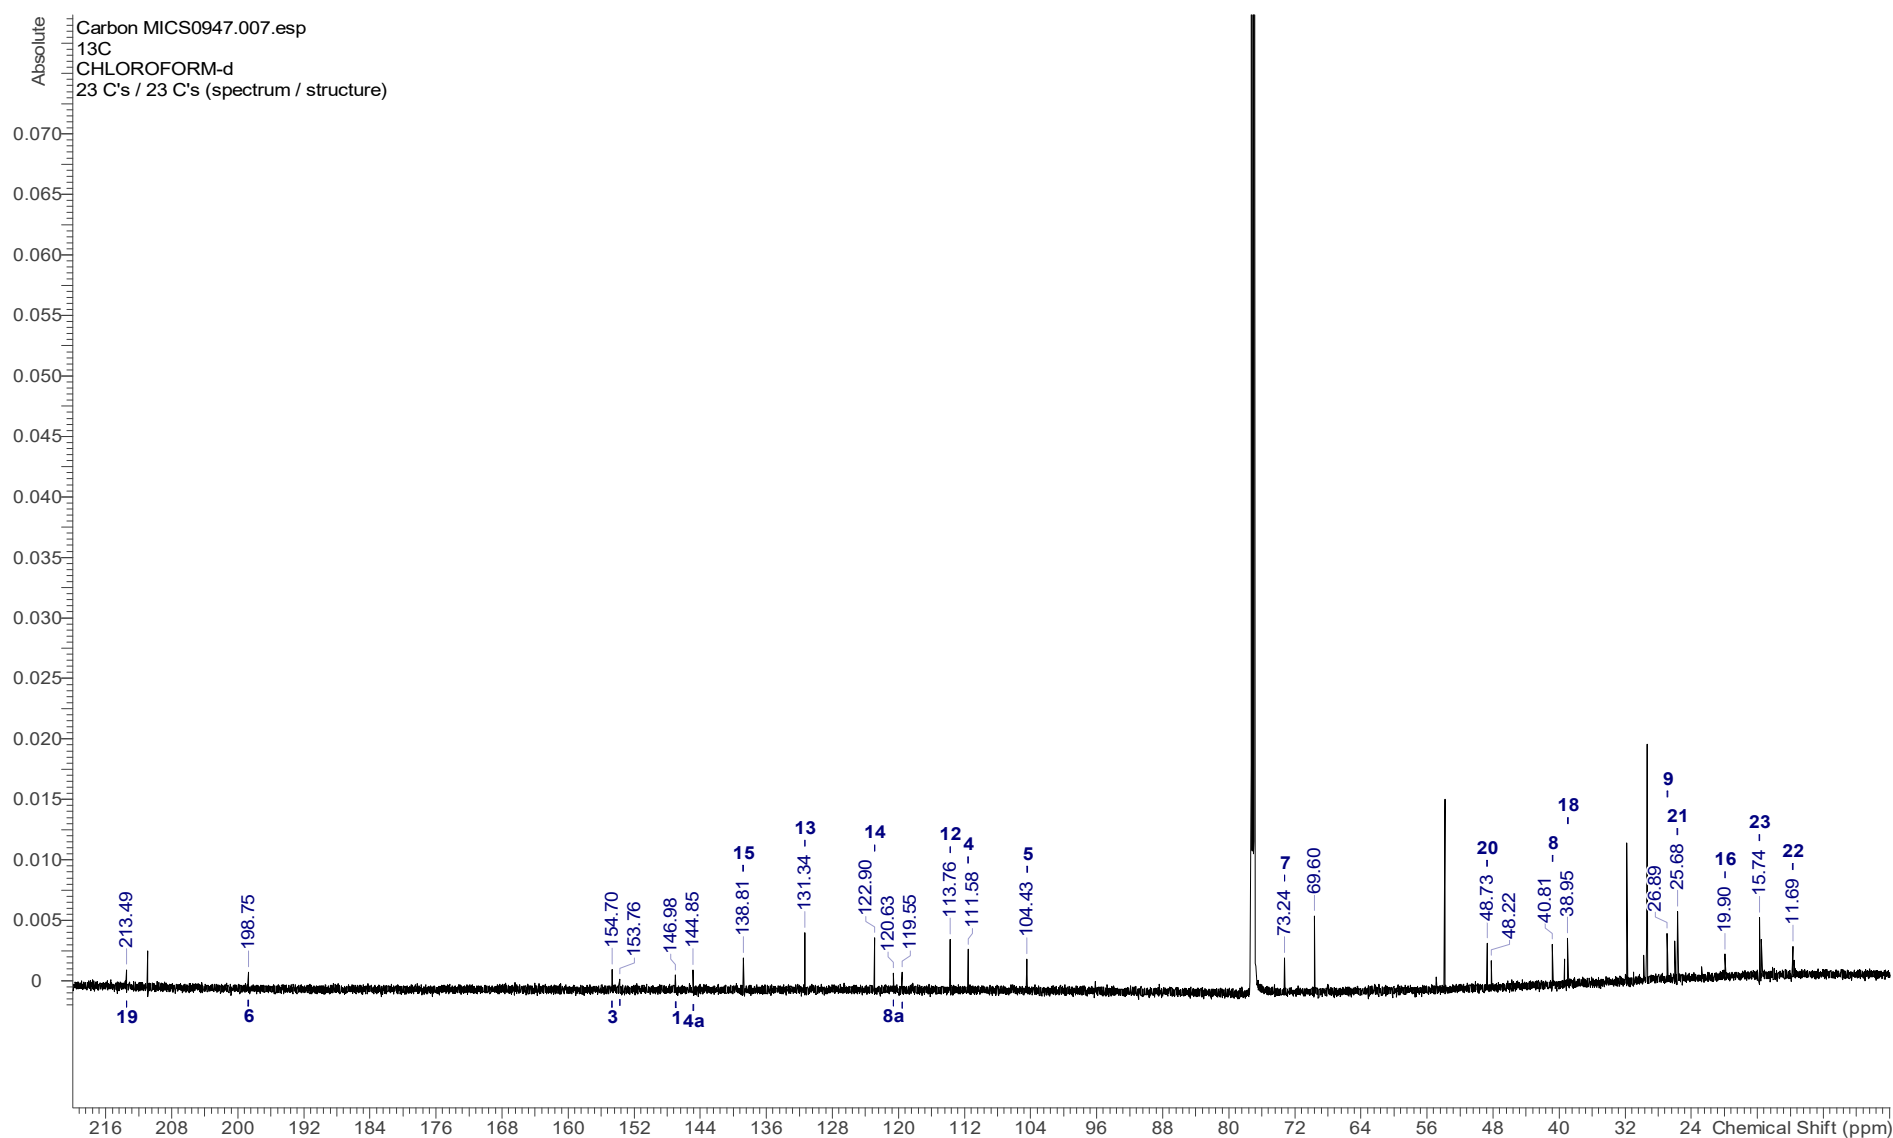

Figure S20.  $^{13}\text{C}$  NMR spectrum (175 MHz,  $\text{CDCl}_3\text{-}d$ ) of multiformin J (15).

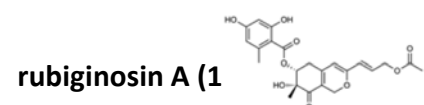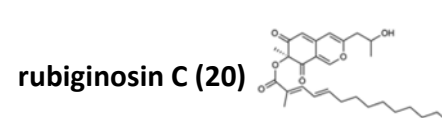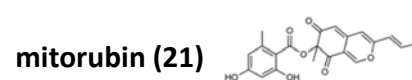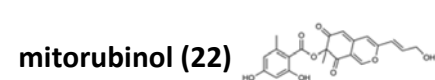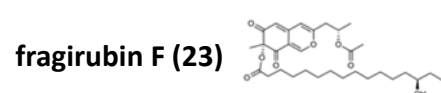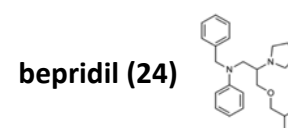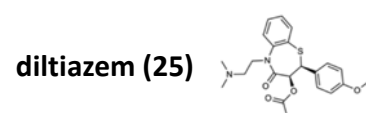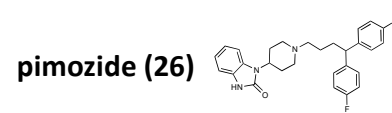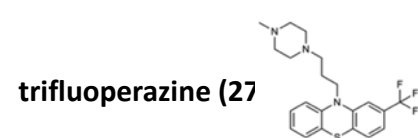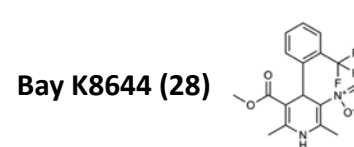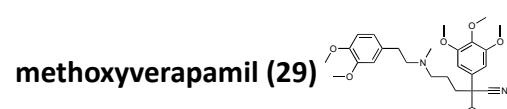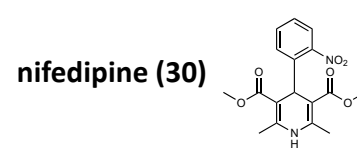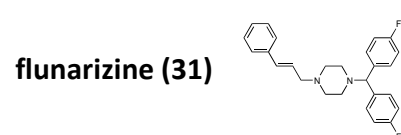

Figure S21. Compounds tested in the microarray-based assay.

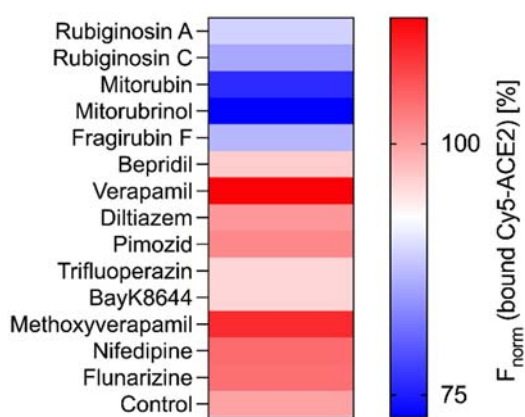

**Figure S22.** Heat map showing binding inhibition of ACE2 and spike protein by substances **19-31**. The fluorescence intensity is given in percentage compared to Cy5-ACE2 binding in control without substance

**Table S1.** Cytotoxicity of cohaerins (**1-5**) and multiformins (**6-15**) tested on mouse fibroblast L-929 cancer cells and KB3.1 ACC 158 cells. \*no cytotoxic activity, \*\*no cytotoxic activity, only inhibition of proliferation.

| No. | Name          | Cytotoxicity mouse fibroblast L-929 cancer cells (µg/mL) [30] | Cytotoxicity KB3.1 ACC 158 cells (IC50 µg/mL) |
|-----|---------------|---------------------------------------------------------------|-----------------------------------------------|
| 1   | Cohaerin C    | 9.8                                                           | 20                                            |
| 2   | Cohaerin D    | 1.5                                                           | n.d.                                          |
| 3   | Cohaerin E    | 7.0                                                           | n.d.                                          |
| 4   | Cohaerin F    | 0.6                                                           | 17                                            |
| 5   | Cohaerin G    | >10                                                           | 2.4                                           |
| 6   | Multiformin A | n.d.                                                          | 3.0                                           |
| 7   | Multiformin B | n.d.                                                          | 17                                            |
| 8   | Multiformin C | n.d.                                                          | 23                                            |
| 9   | Multiformin D | n.d.                                                          | *                                             |
| 10  | Multiformin E | n.d.                                                          | 30                                            |
| 11  | Multiformin F | n.d.                                                          | 7.4                                           |
| 12  | Multiformin G | n.d.                                                          | *                                             |
| 13  | Multiformin H | n.d.                                                          | 24**                                          |
| 14  | Multiformin I | n.d.                                                          | **                                            |
| 15  | Multiformin J | n.d.                                                          | n.d.                                          |

**Table S2.** All tested substances in the microarray-based screening assay. Inhibition of ACE2 and spike protein binding is given in percentage based on fluorescence signal of control without substance.

| No. | Name          | Concentration (µM) | Inhibition (%) |
|-----|---------------|--------------------|----------------|
| 1   | Cohaerin C    | 40                 | 24.98          |
| 2   | Cohaerin D    | 40                 | 45.05          |
| 3   | Cohaerin E    | 40                 | 35.96          |
| 4   | Cohaerin F    | 40                 | 55.65          |
| 5   | Cohaerin G    | 40                 | −2.04          |
| 6   | Multiformin A | 40                 | 18.10          |
| 7   | Multiformin B | 40                 | 1.94           |
| 8   | Multiformin C | 40                 | 23.53          |
| 9   | Multiformin D | 40                 | 16.44          |
| 10  | Multiformin E | 40                 | n.d.           |
| 11  | Multiformin F | 40                 | 5.19           |
| 12  | Multiformin G | 40                 | 13.39          |
| 13  | Multiformin H | 40                 | −9.45          |
| 14  | Multiformin I | 40                 | −15.05         |
| 15  | Multiformin J | 40                 | 31.40          |

---

|    |                                   |    |       |
|----|-----------------------------------|----|-------|
| 16 | Mycophenolic acid (MPA)           | 40 | 25.31 |
| 17 | Imatinib                          | 40 | -9.45 |
| 18 | Quinacrine dihydrochloride (QNHC) | 40 | 20.08 |
| 19 | Rubiginosin A                     | 22 | 10.88 |
| 20 | Rubiginosin C                     | 22 | 14.18 |
| 21 | Mitorubin                         | 26 | 23.90 |
| 22 | Mitorubinol                       | 25 | 27.18 |
| 23 | Fragirubin F                      | 18 | 12.99 |
| 24 | Bepridil                          | 27 | 3.40  |
| 25 | Diltiazem                         | 24 | -0.68 |
| 26 | Pimozid                           | 22 | -1.84 |
| 27 | Trifluoperazin                    | 25 | 4.06  |
| 28 | BayK8644                          | 28 | 4.11  |
| 29 | Methoxyverapamil                  | 19 | -9.32 |
| 30 | Nifedipine                        | 29 | -4.25 |
| 31 | Flunarizine                       | 25 | -3.80 |

---
